# Supplementary material
Source: PubMed Central journal article supplement (PMC6010140)

# Design, Synthesis and Docking Study of Novel Coumarin Ligands as Potential Selective Acetylcholinesterase Inhibitors

Fatih Sonmez<sup>1,\*</sup>, Belma Zengin Kurt<sup>2</sup>, Isil Gazioglu<sup>2</sup>, Livia Basile<sup>3,\*\*</sup>, Aydan Dag <sup>2</sup>, Valentina Cappello<sup>3</sup>, Tiziana Ginex<sup>4</sup>, Mustafa Kucukislamoglu<sup>5</sup> and Salvatore Guccione<sup>3</sup>

<sup>1</sup>*Sakarya University, Pamukova Vocational High School, 54900, Sakarya, TURKEY*

<sup>2</sup>*Bezmialem Vakif University, Faculty of Pharmacy, Department of Analytical and Pharmaceutical Chemistry, 34093, Istanbul, TURKEY*

<sup>3</sup>*Department of Drug Sciences, University of Catania, Viale A. Doria 6 Ed. 2, Città Universitaria, I- 95125, Catania, ITALY*

<sup>4</sup>*Molecular Modelling Laboratory, Department of Food Science, University of Parma, Parco Area delle Scienze 17/A, Parma 43124, ITALY*

<sup>5</sup>*Sakarya University, Faculty of Arts and Science, Department of Chemistry, 54055, Sakarya, TURKEY*

\* Corresponding authors. Tel.: +90-264-2953378, fax: +90-264-2953679 (F. Sonmez); e-mail addresses: [fsonmez@sakarya.edu.tr](mailto:fsonmez@sakarya.edu.tr) (F. Sonmez).

\*\* Corresponding authors. Tel.: +39-095-7384020; e-mail addresses: [basilelivia@gmail.com](mailto:basilelivia@gmail.com), [liviabasile@unict.it](mailto:liviabasile@unict.it) (L. Basile).

## SUPPLEMENTARY MATERIALS

|                                                                            |      |
|----------------------------------------------------------------------------|------|
| <sup>1</sup> H and <sup>13</sup> C NMR and MS spectra of <b>6a-t</b> ..... | 2-31 |
|----------------------------------------------------------------------------|------|

**S1:**  $^1\text{H}$  and  $^{13}\text{C}$  NMR and MS spectra of **6a**

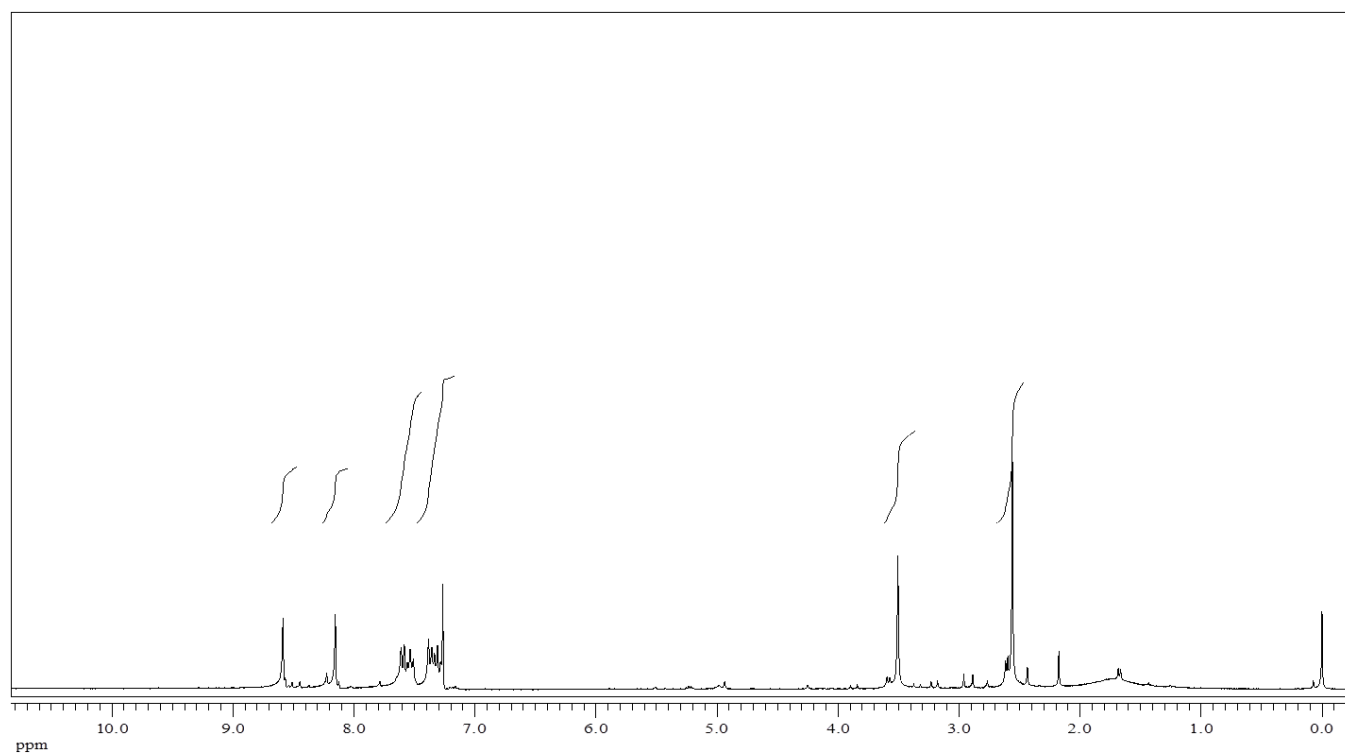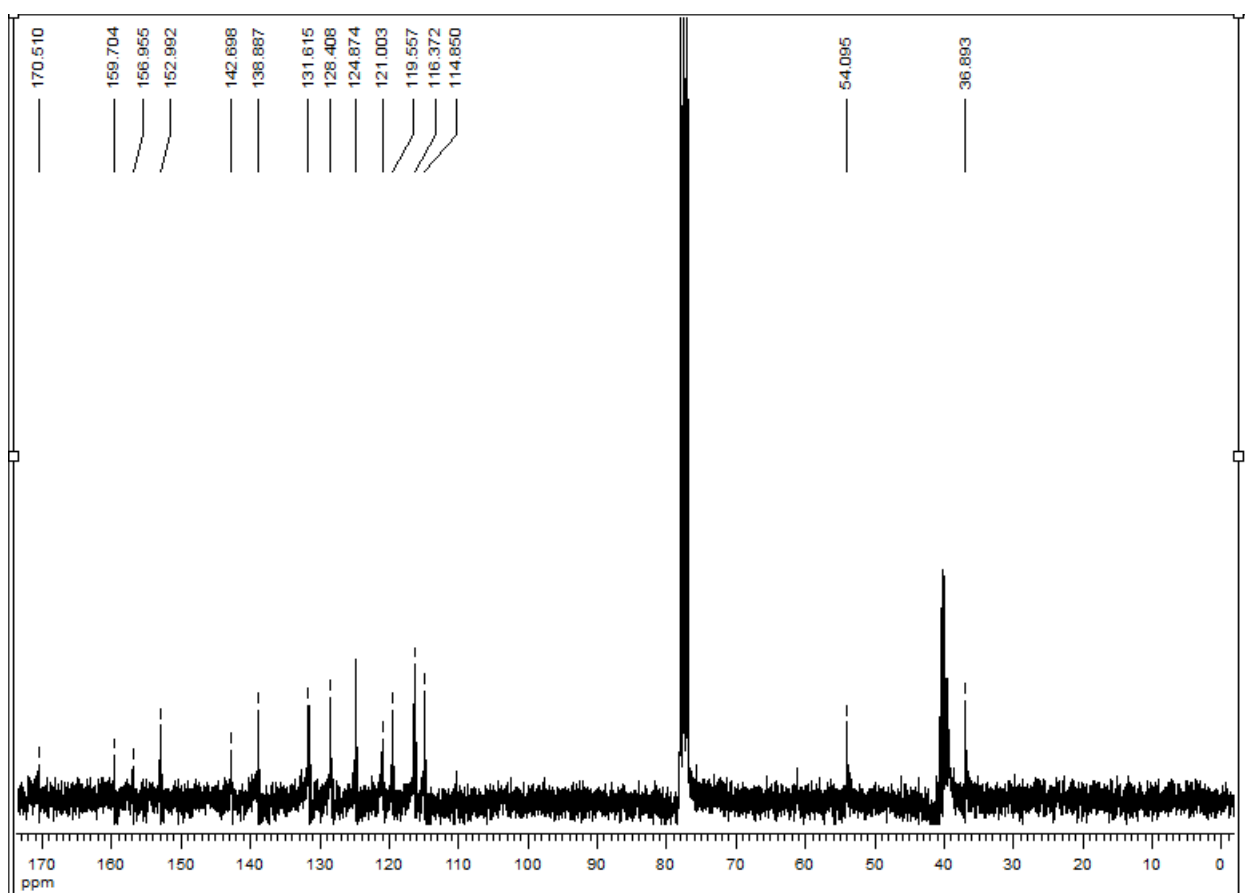

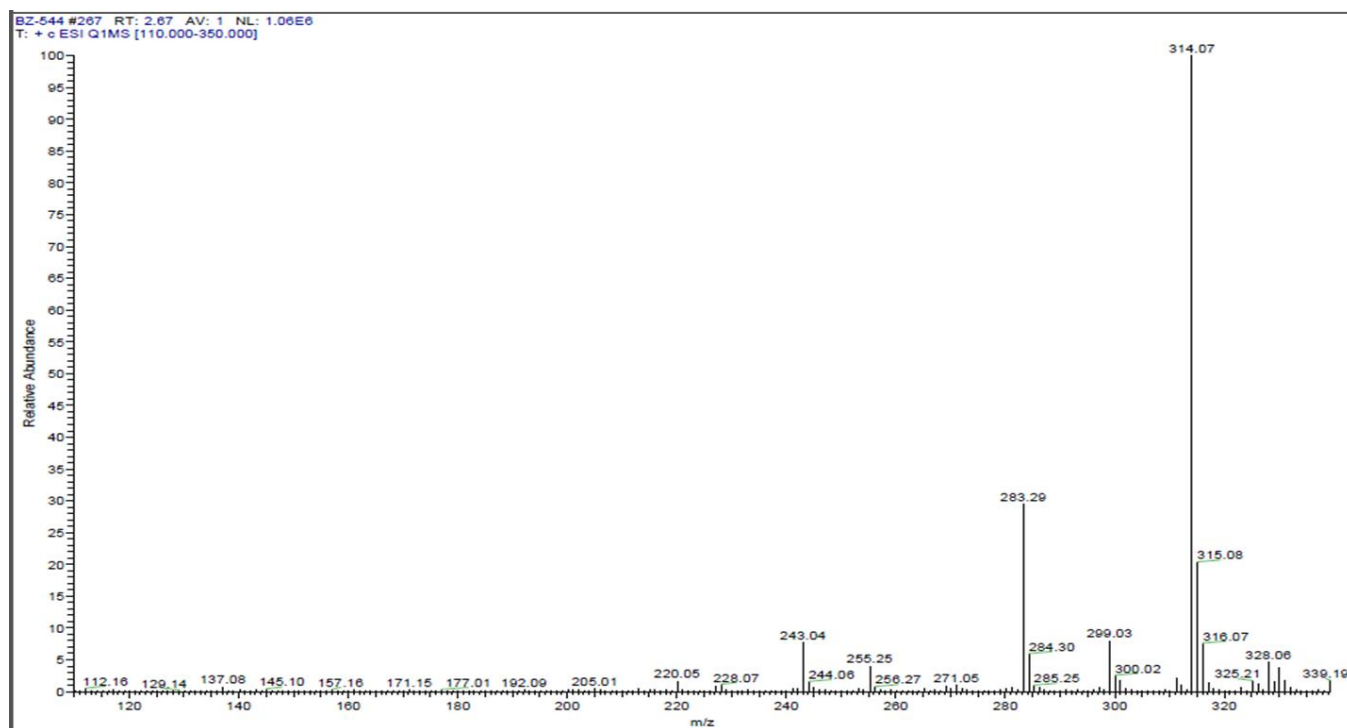

**S2:**  $^1\text{H}$  and  $^{13}\text{C}$  NMR and MS spectra of **6b**

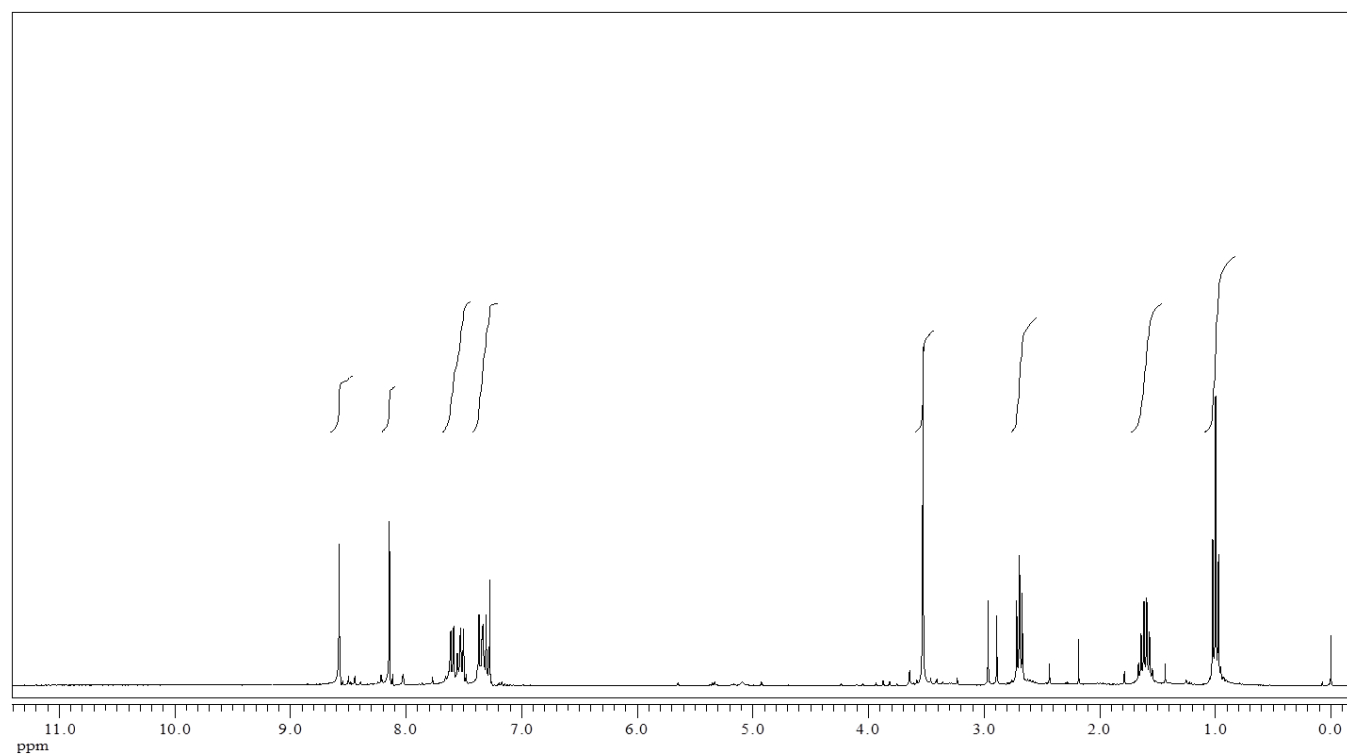

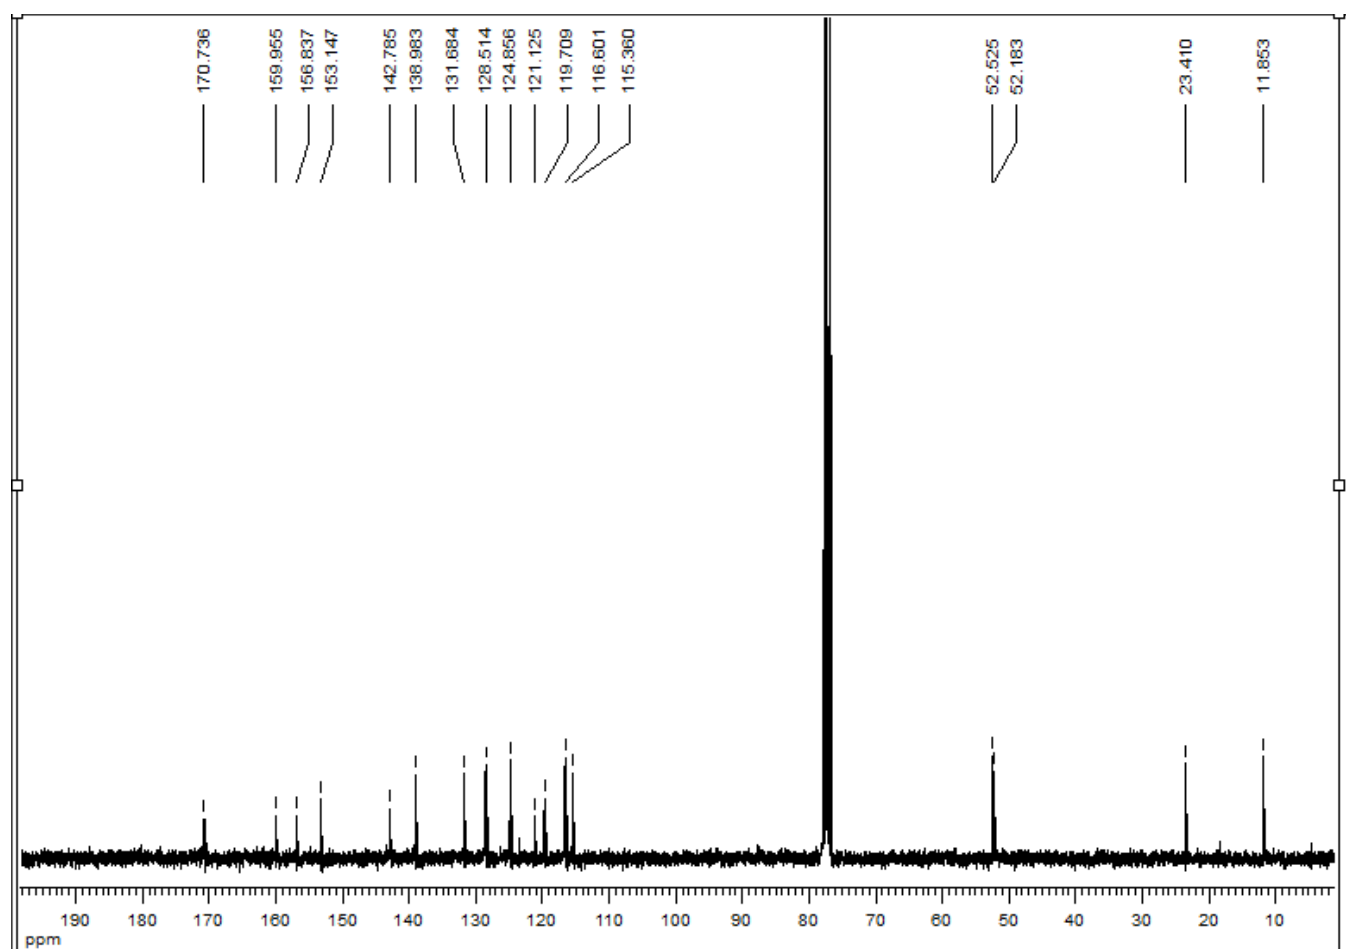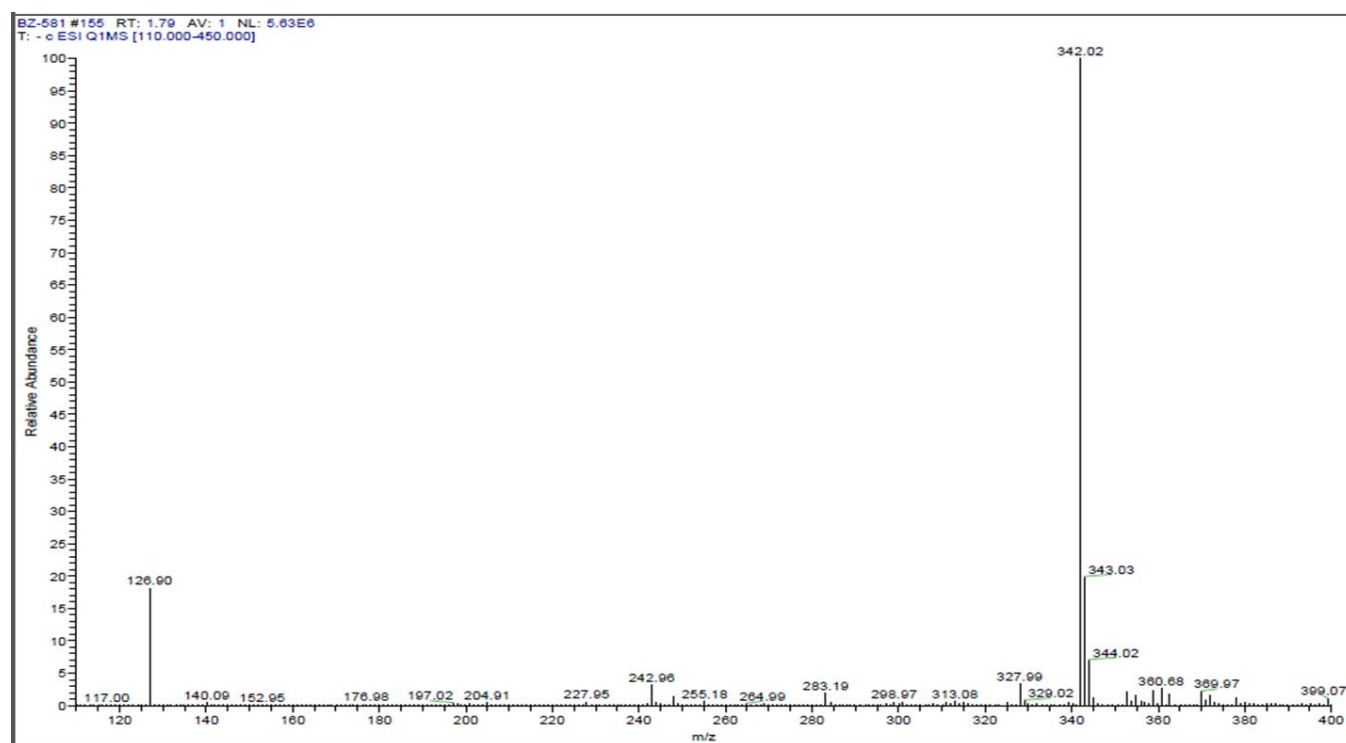

**S3:**  $^1\text{H}$  and  $^{13}\text{C}$  NMR and MS spectra of **6c**

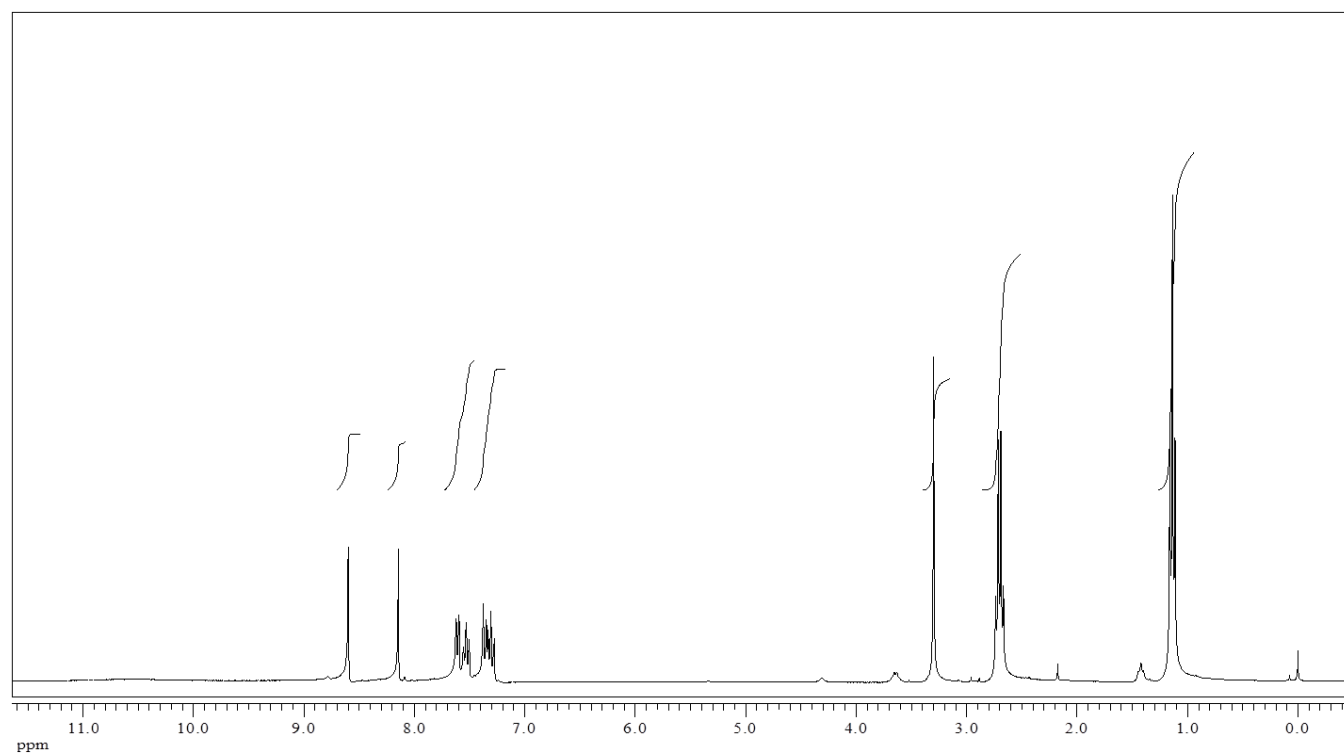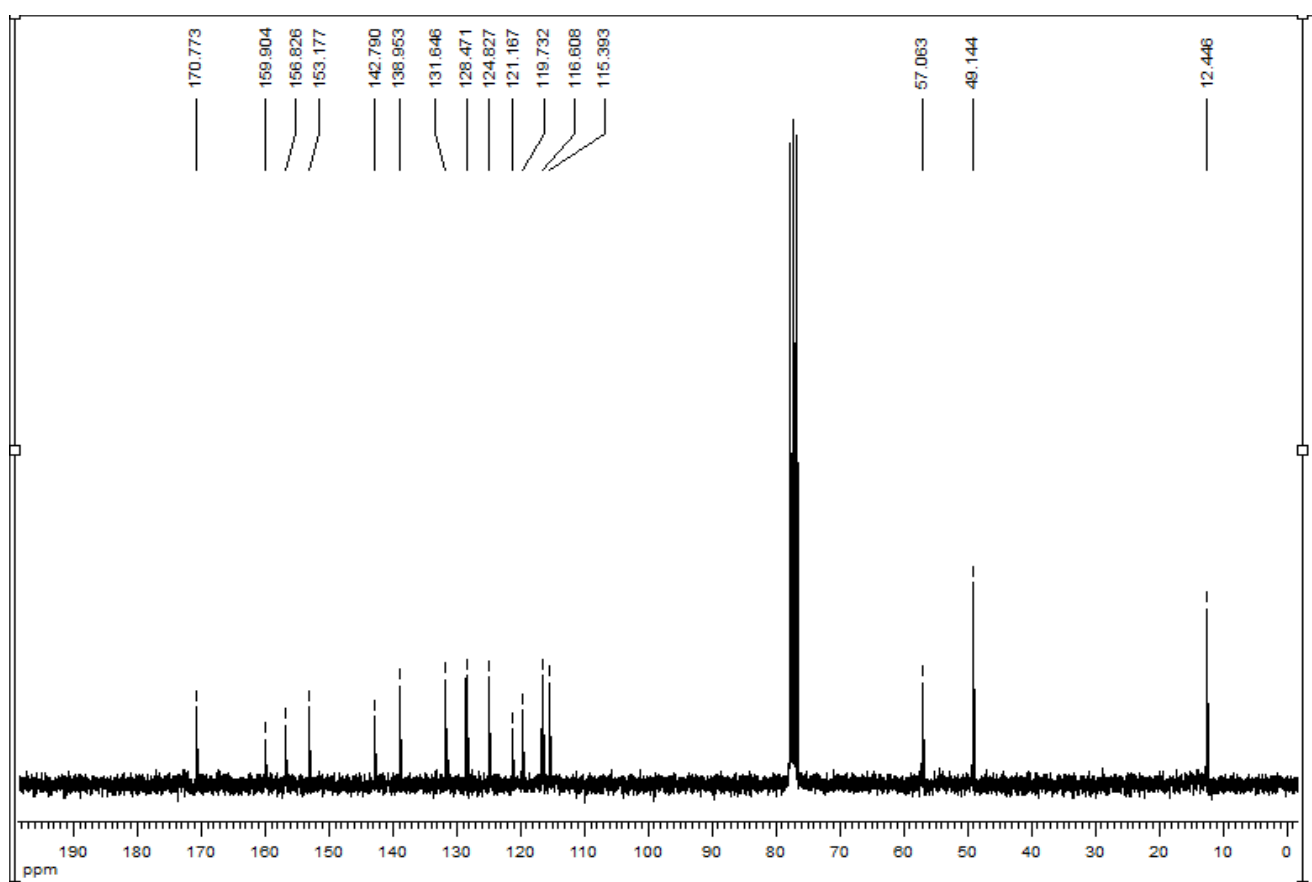

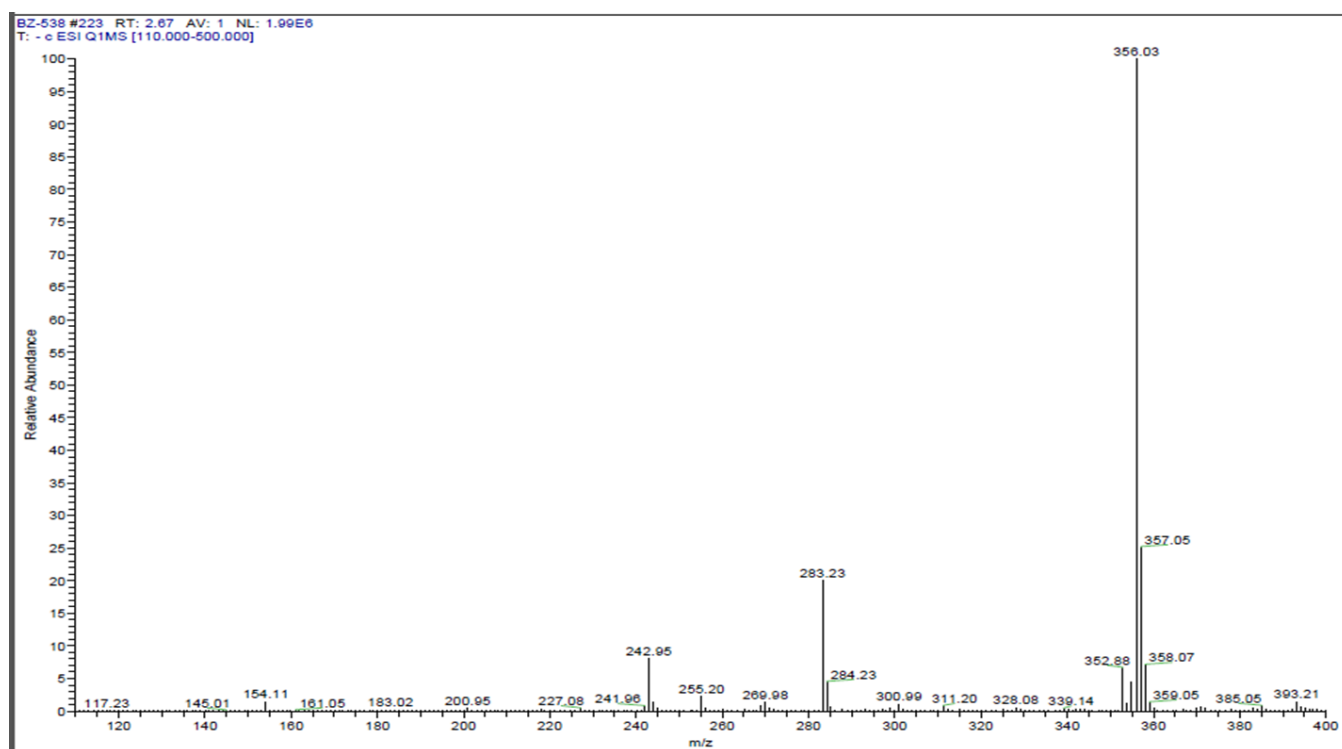

**S4:**  $^1\text{H}$  and  $^{13}\text{C}$  NMR and MS spectra of **6d**

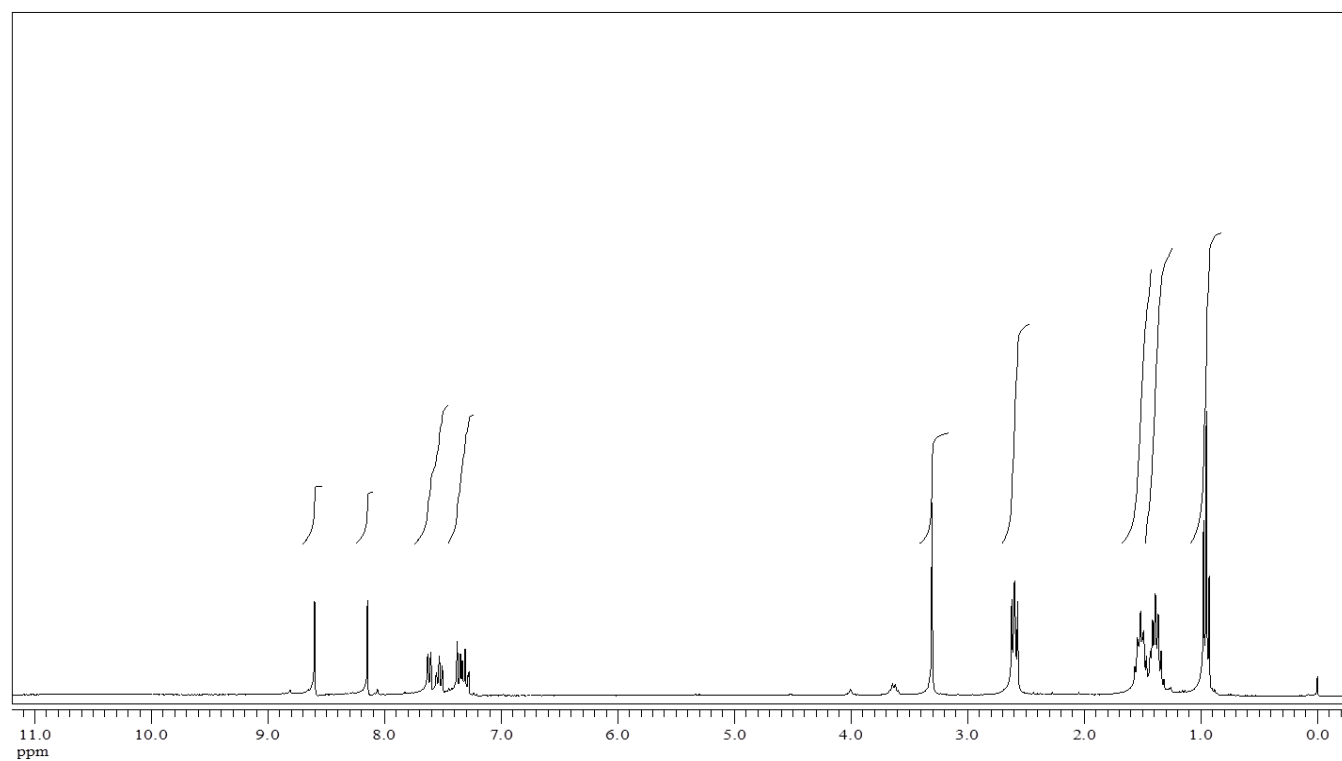

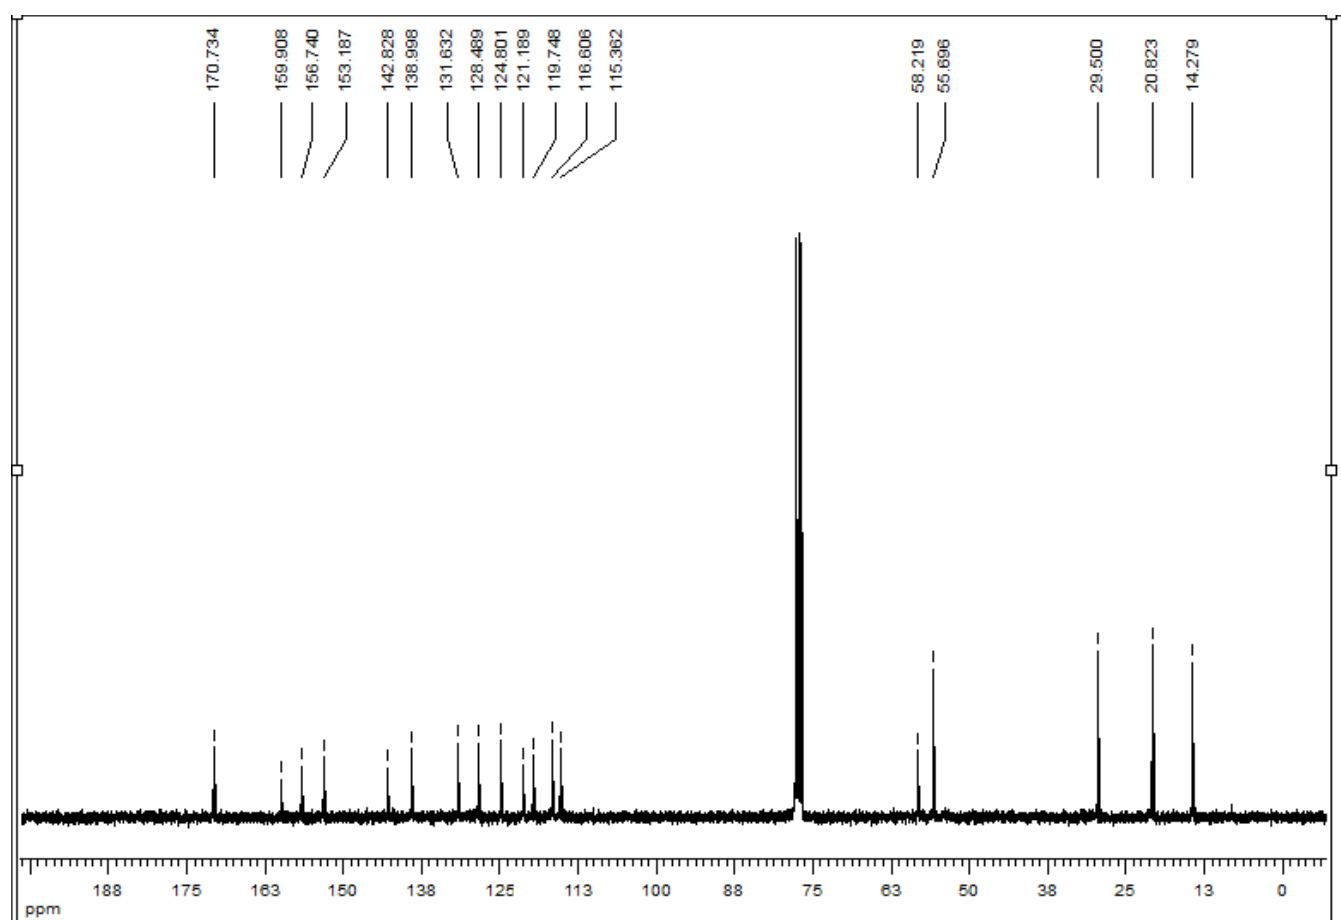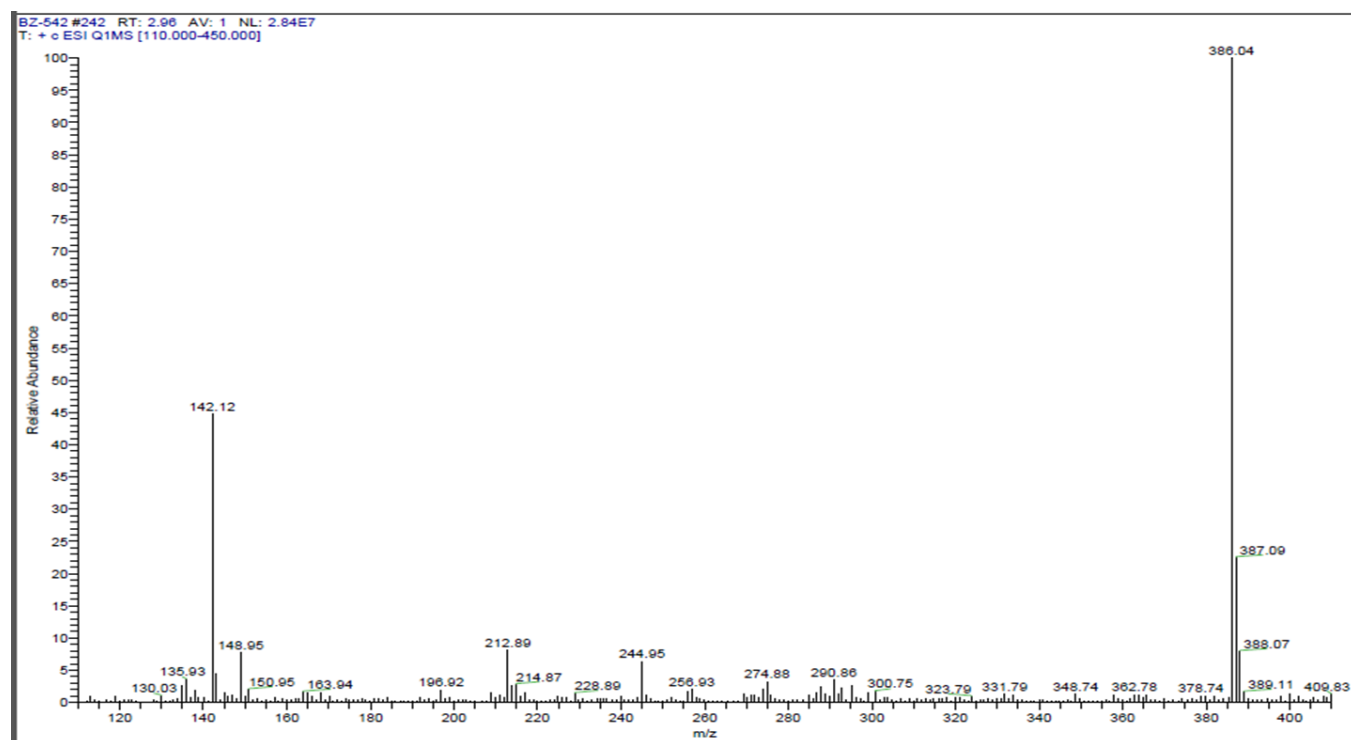

**S5:**  $^1\text{H}$  and  $^{13}\text{C}$  NMR and MS spectra of **6e**

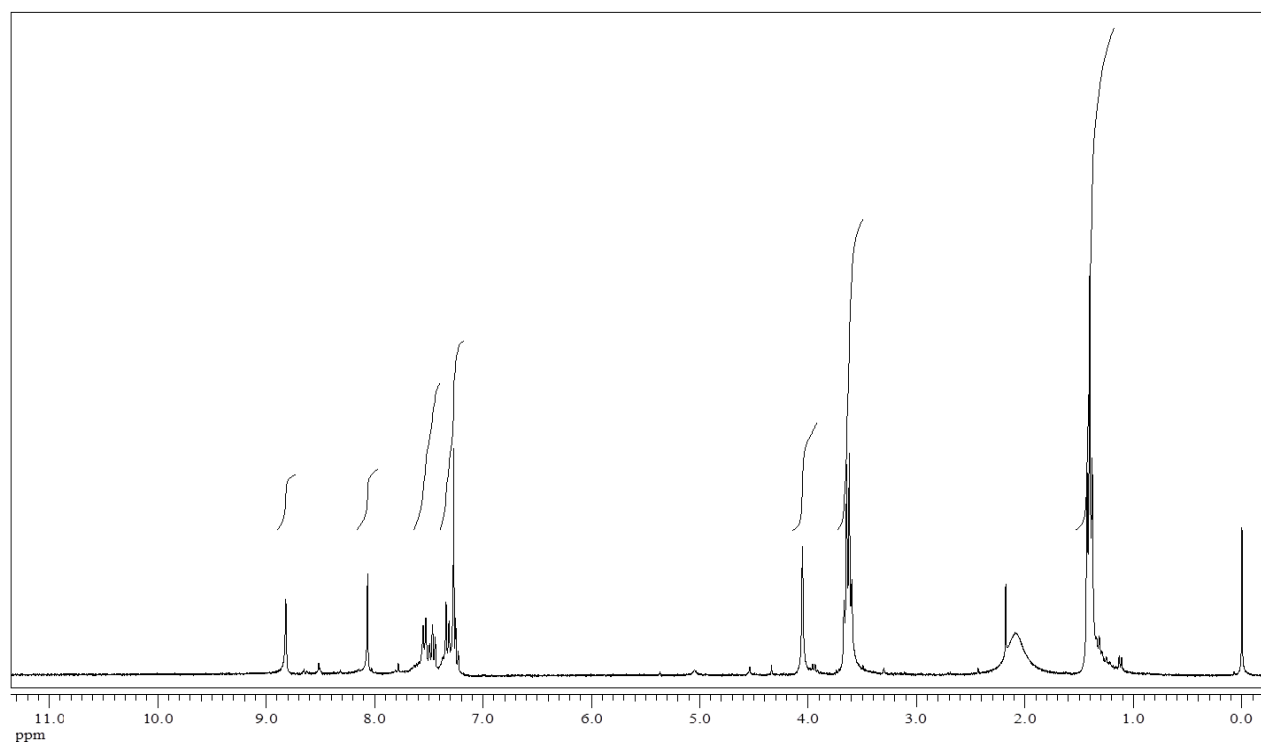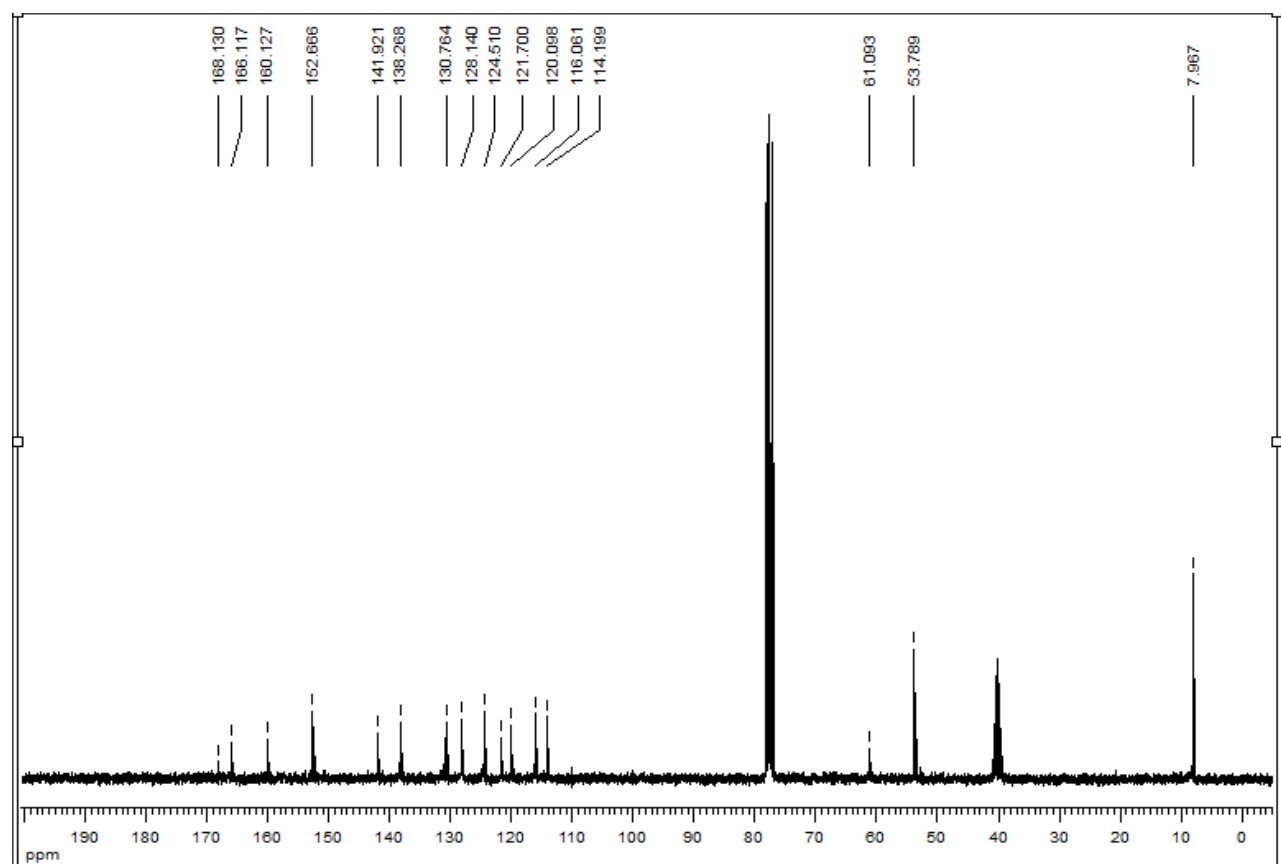

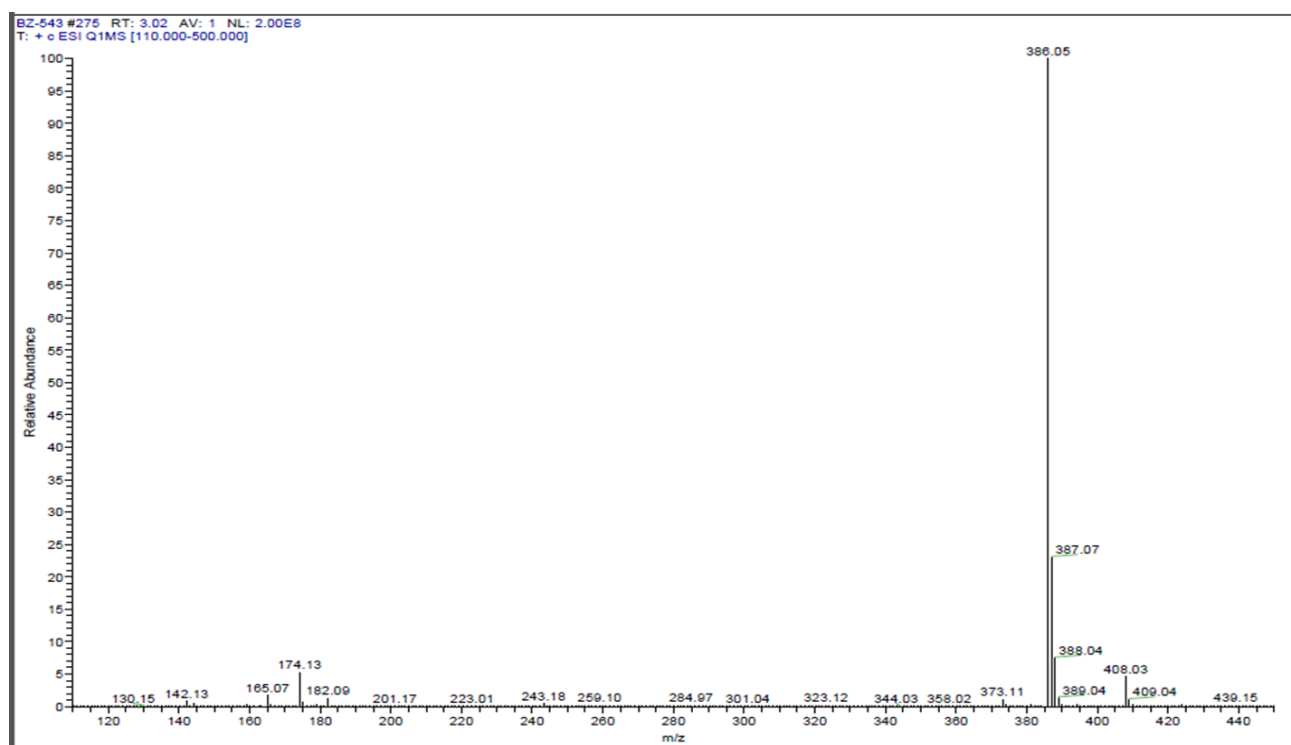

**S6:**  $^1\text{H}$  and  $^{13}\text{C}$  NMR and MS spectra of **6f**

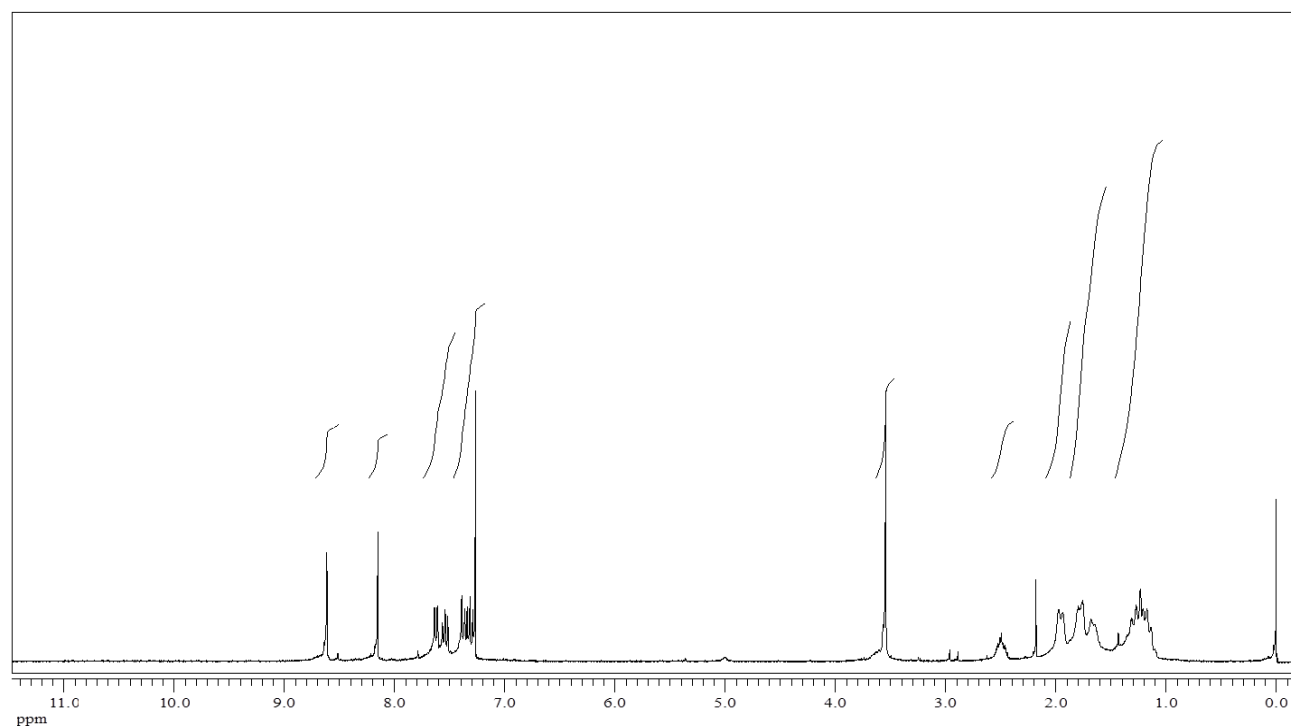

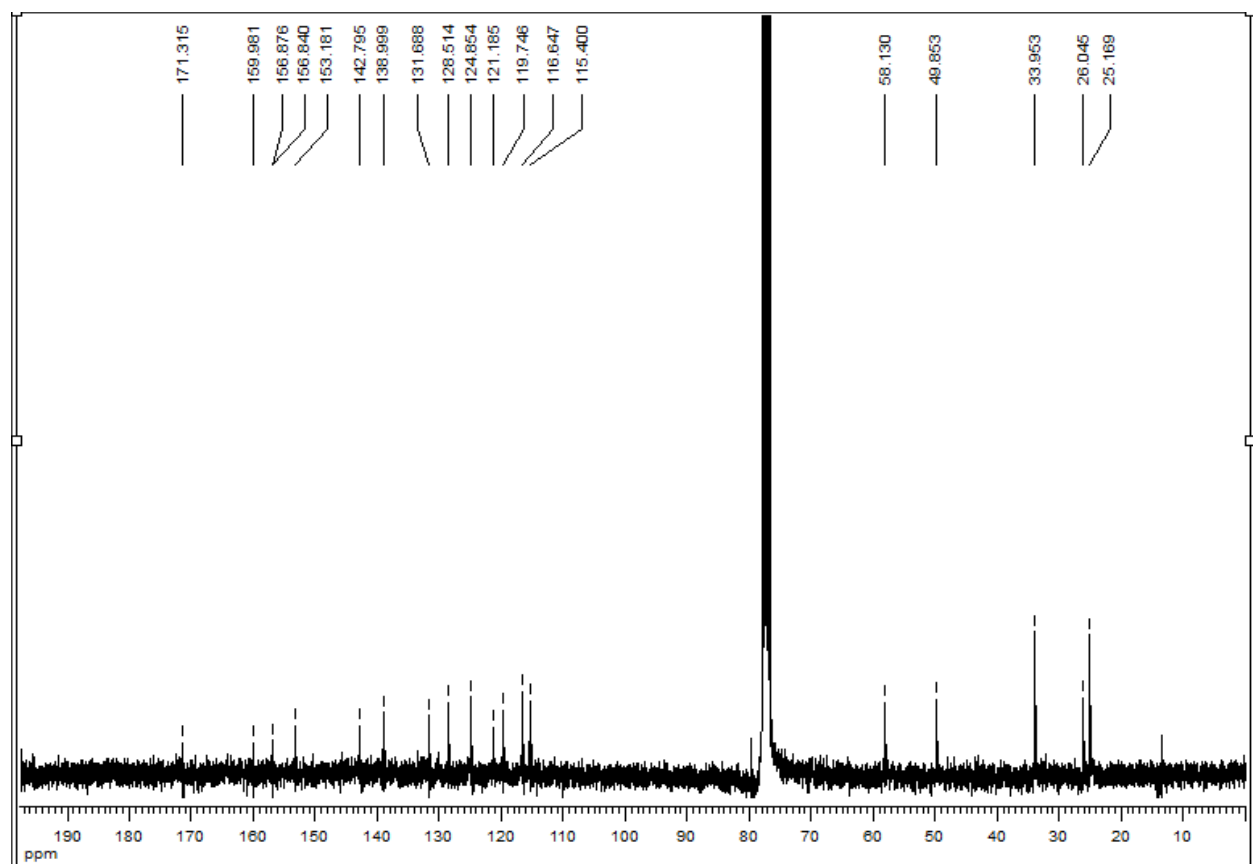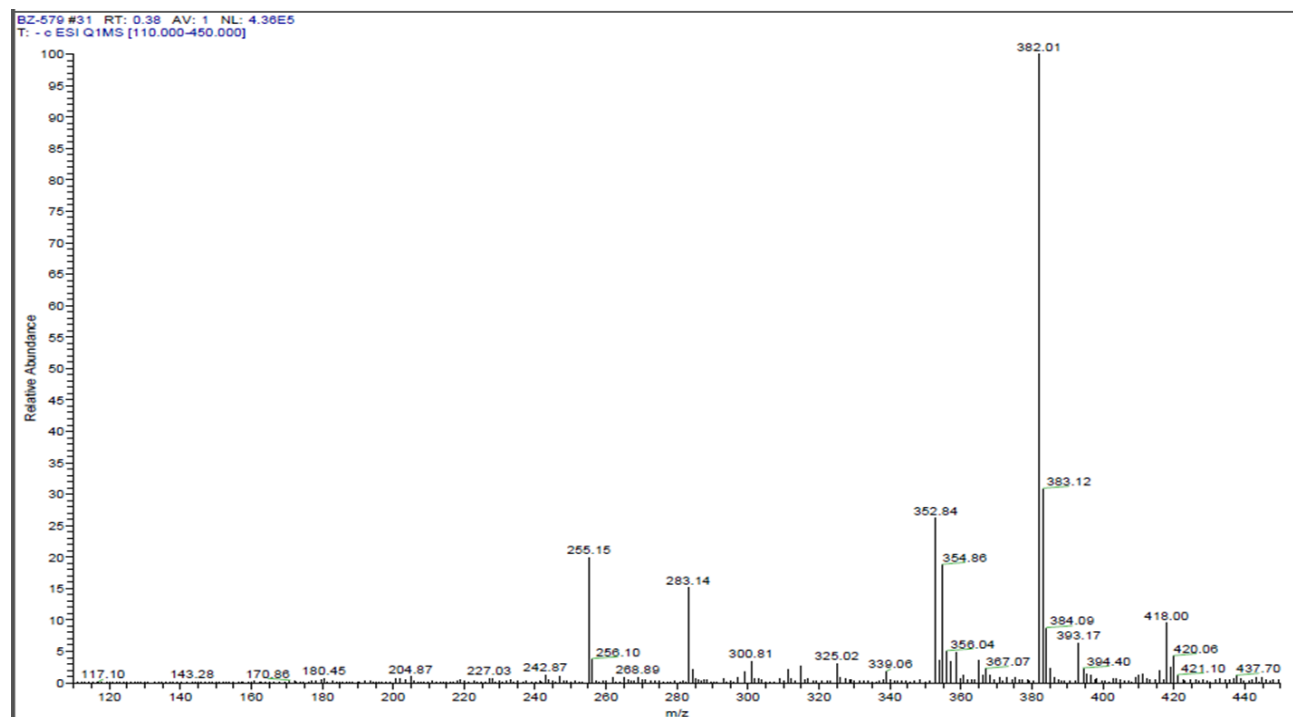

**S7:**  $^1\text{H}$  and  $^{13}\text{C}$  NMR and MS spectra of **6g**

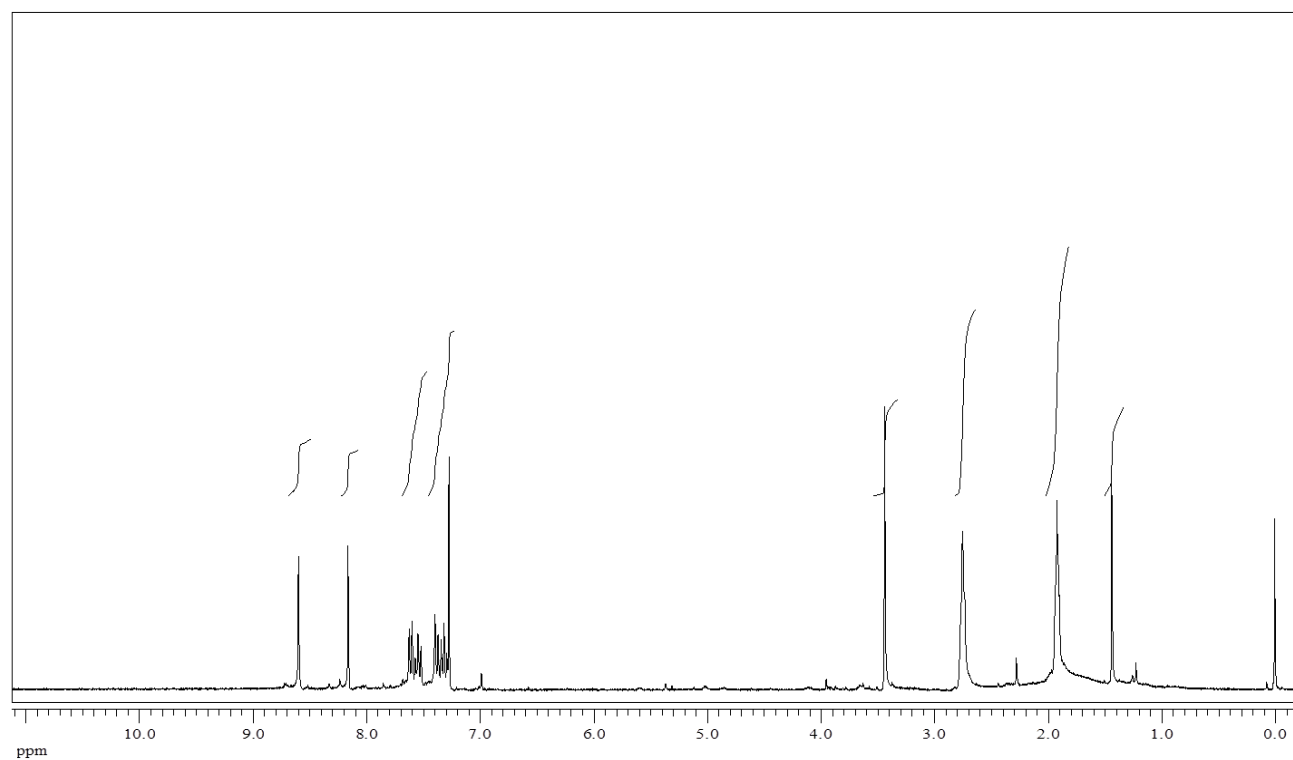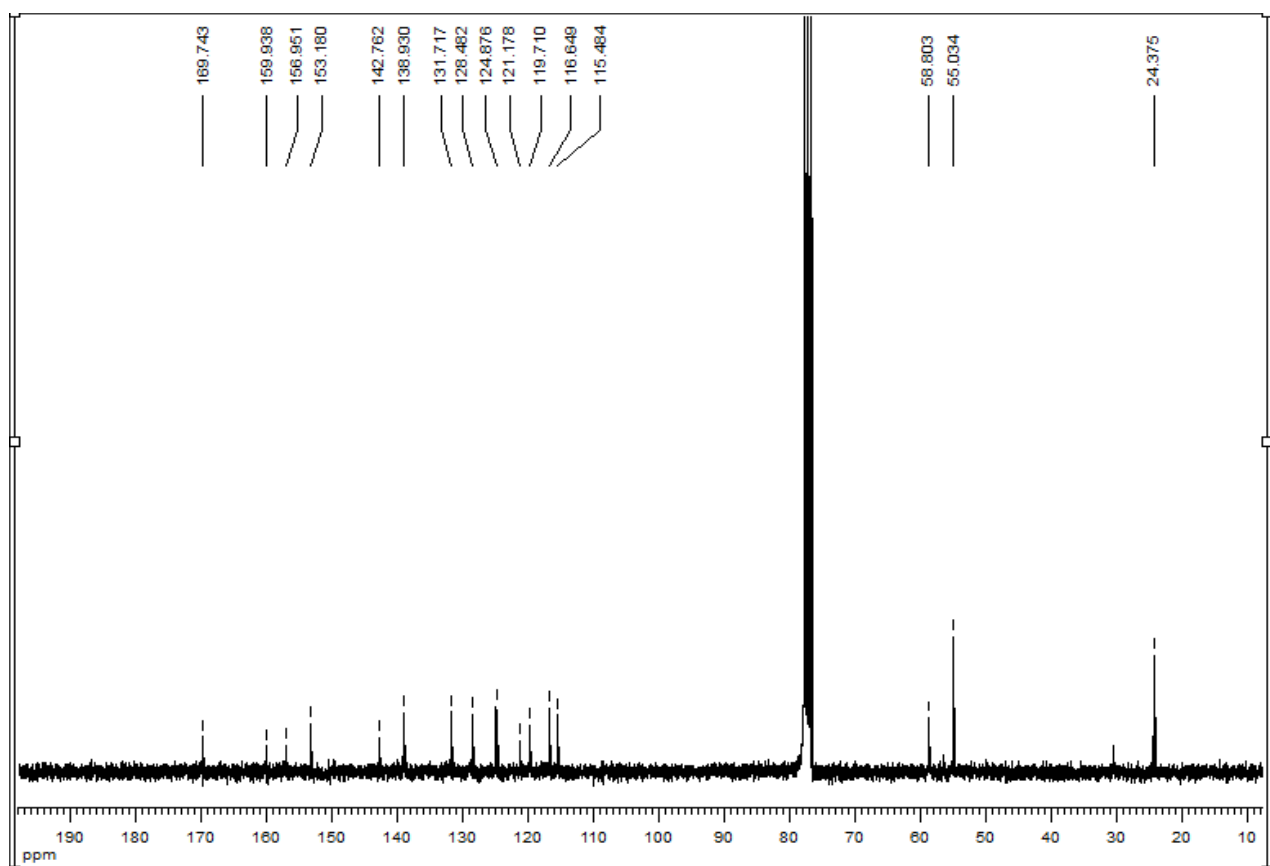

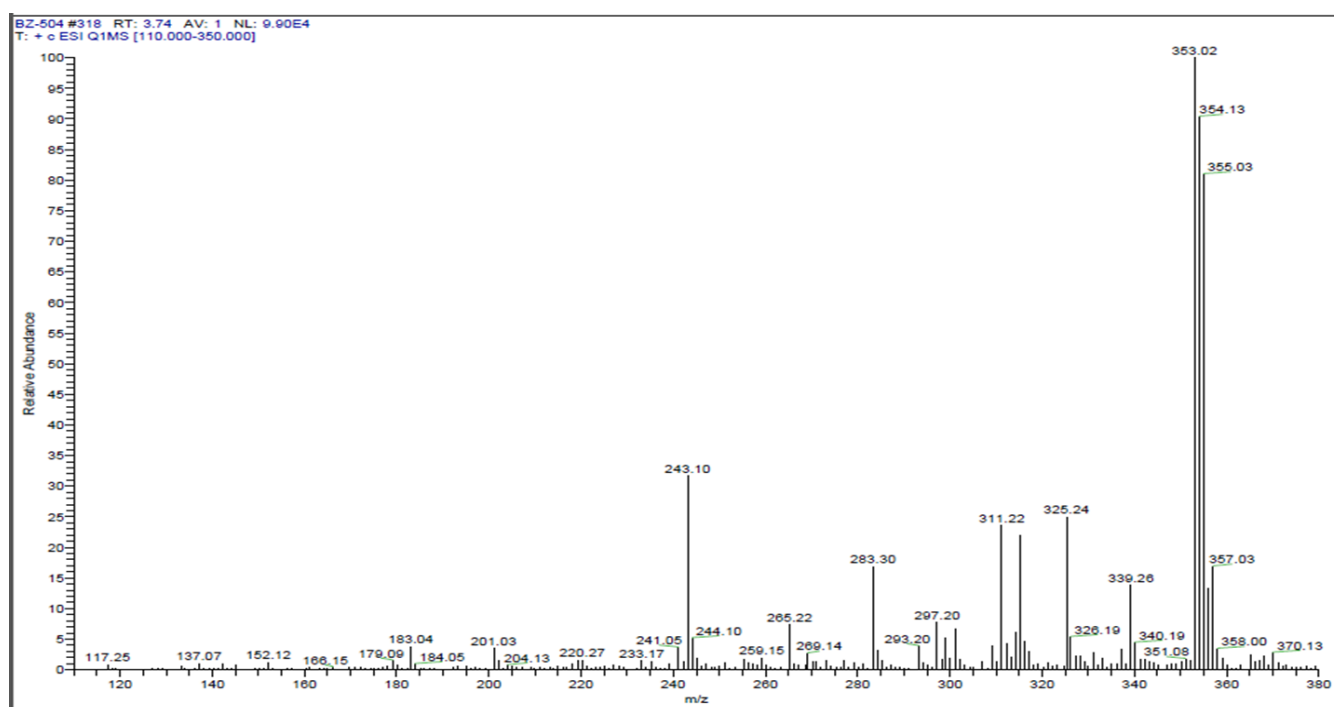

**S8:**  $^1\text{H}$  and  $^{13}\text{C}$  NMR and MS spectra of **6h**

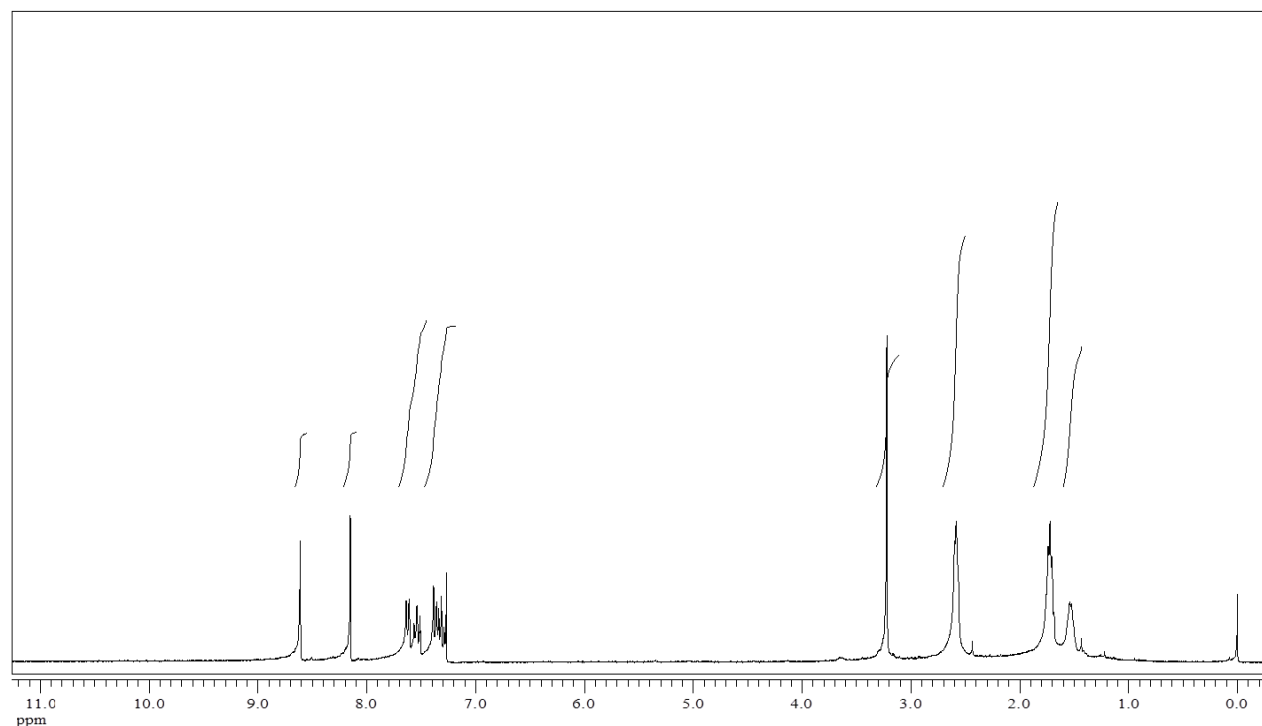

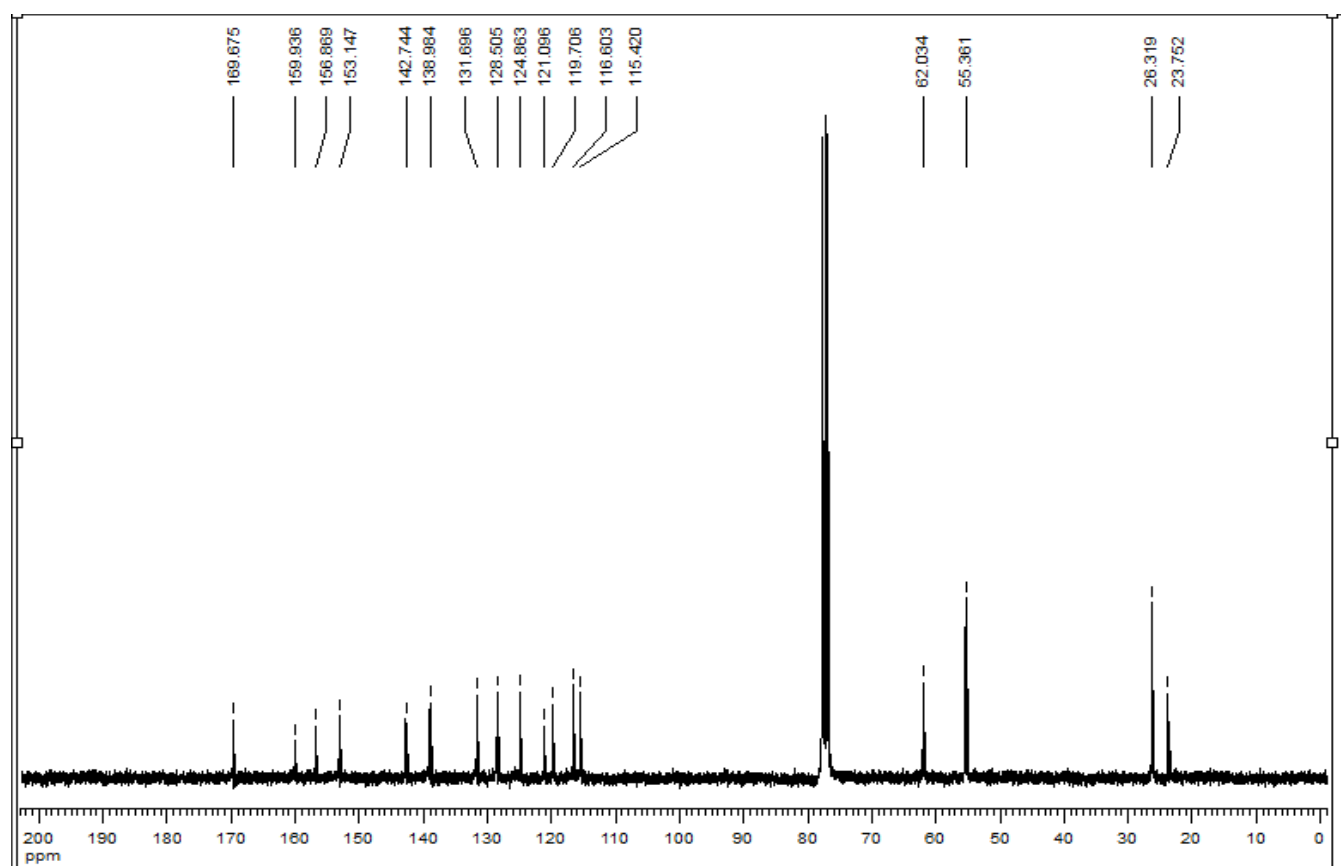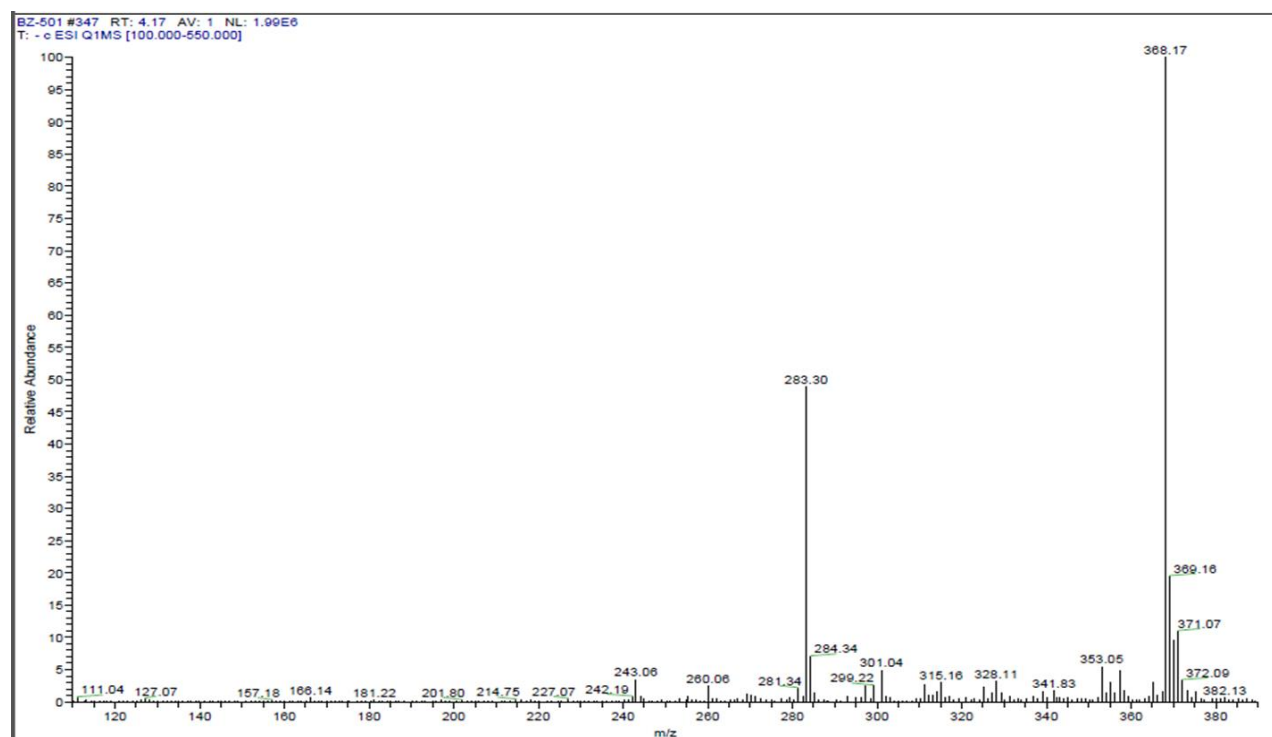

**S9:**  $^1\text{H}$  and  $^{13}\text{C}$  NMR and MS spectra of **6i**

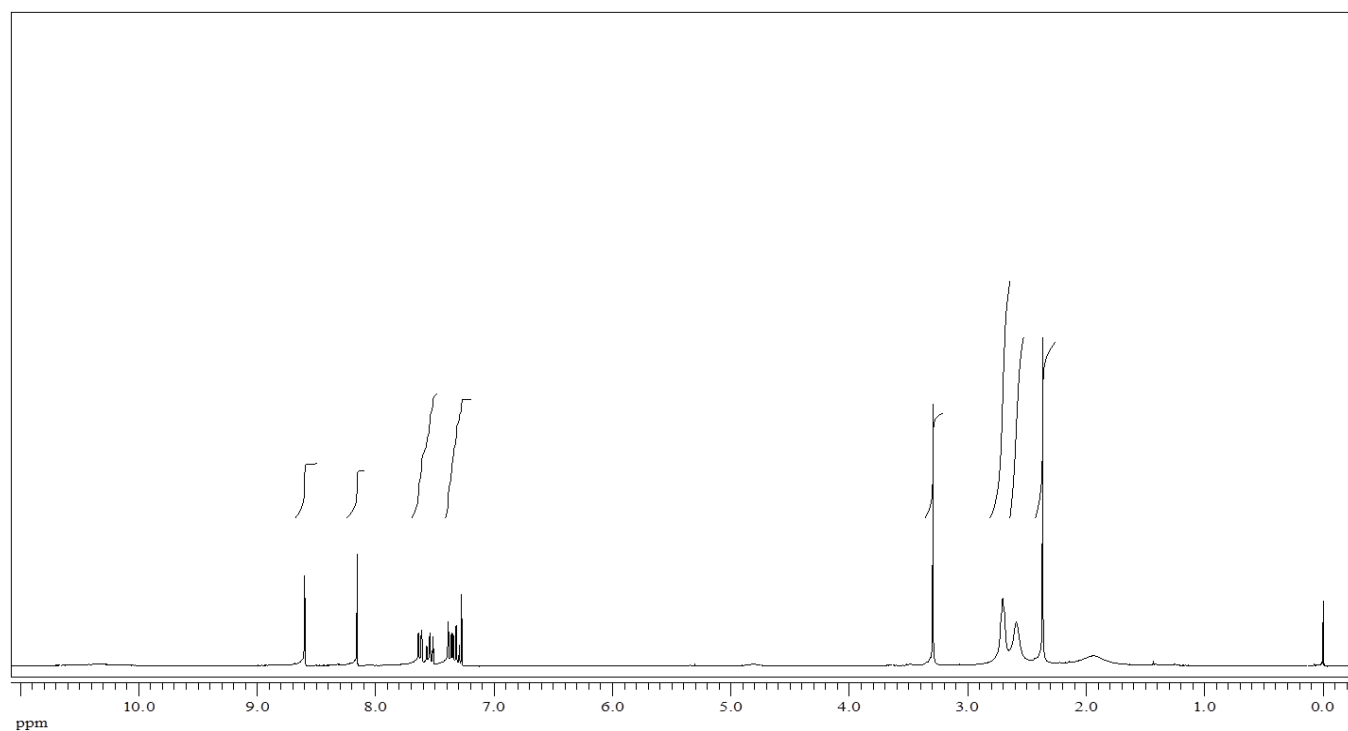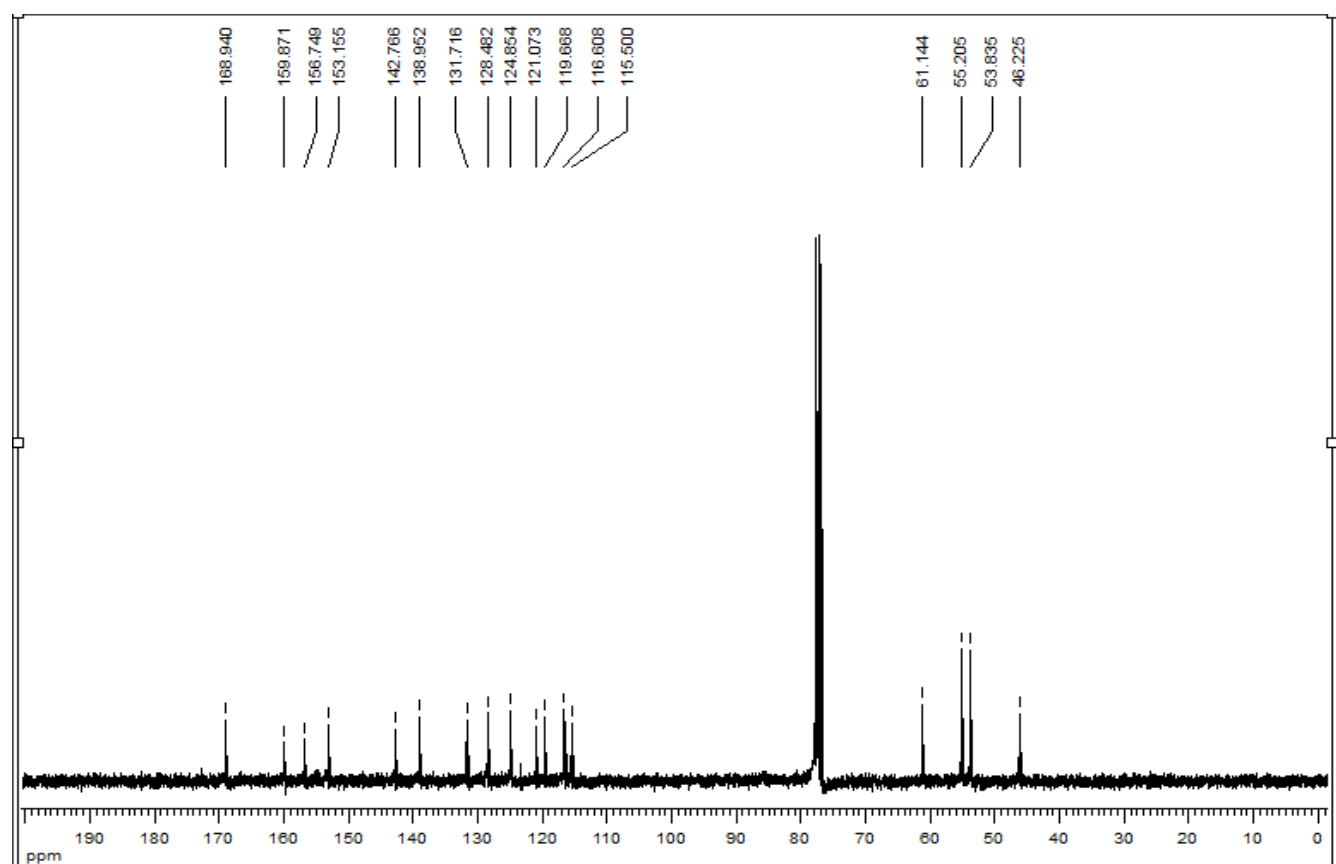

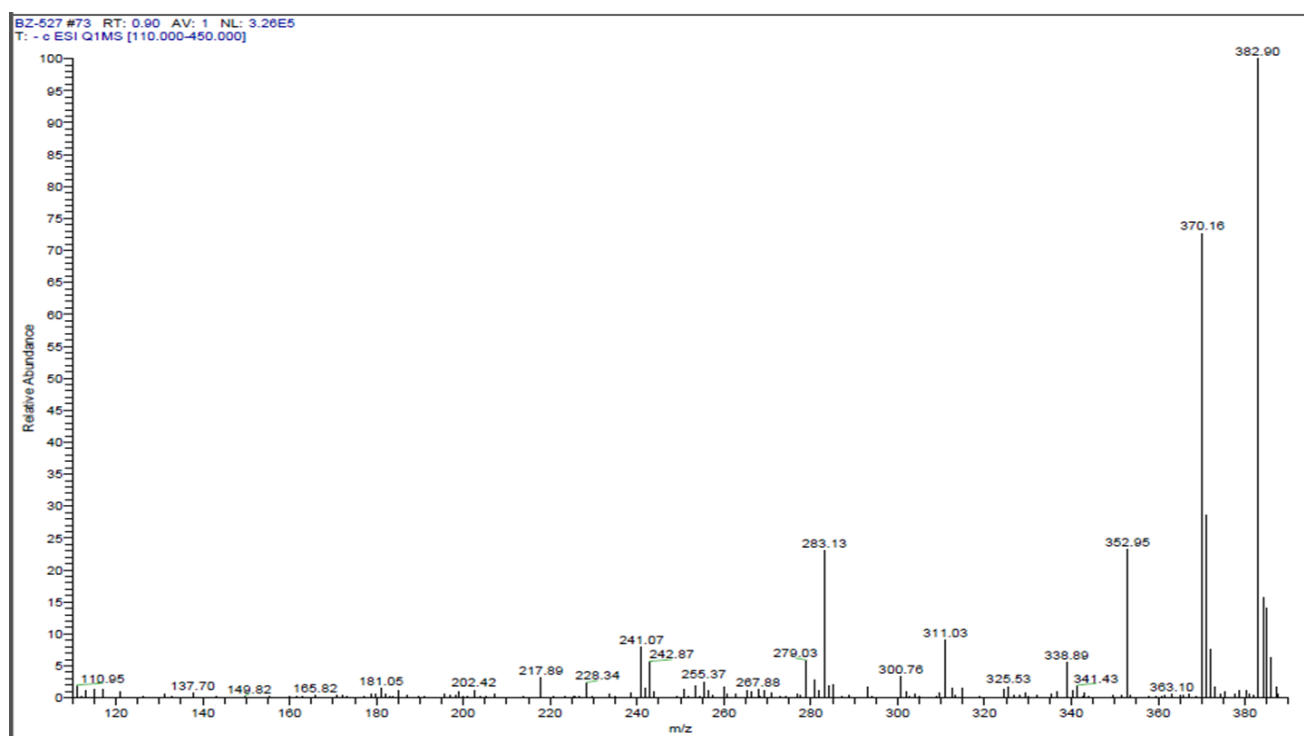

**S10:**  $^1\text{H}$  and  $^{13}\text{C}$  NMR and MS spectra of **6j**

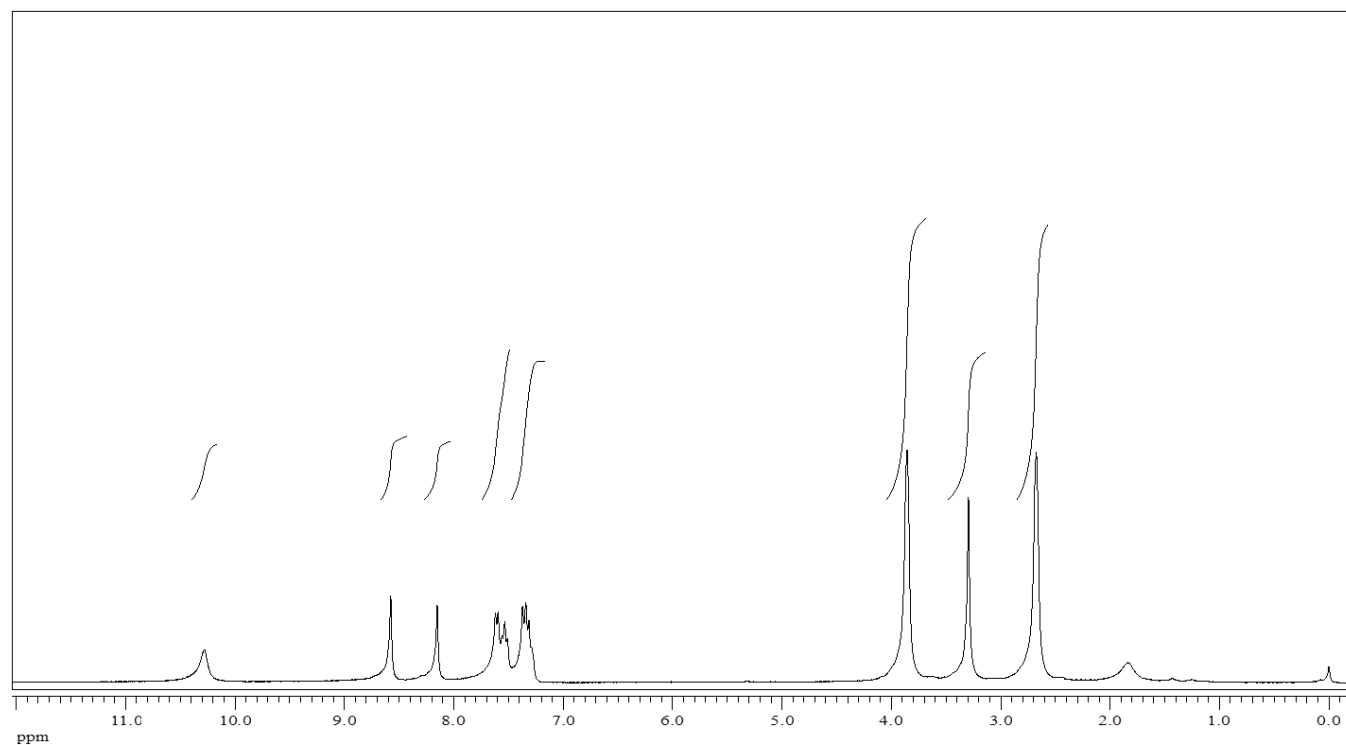

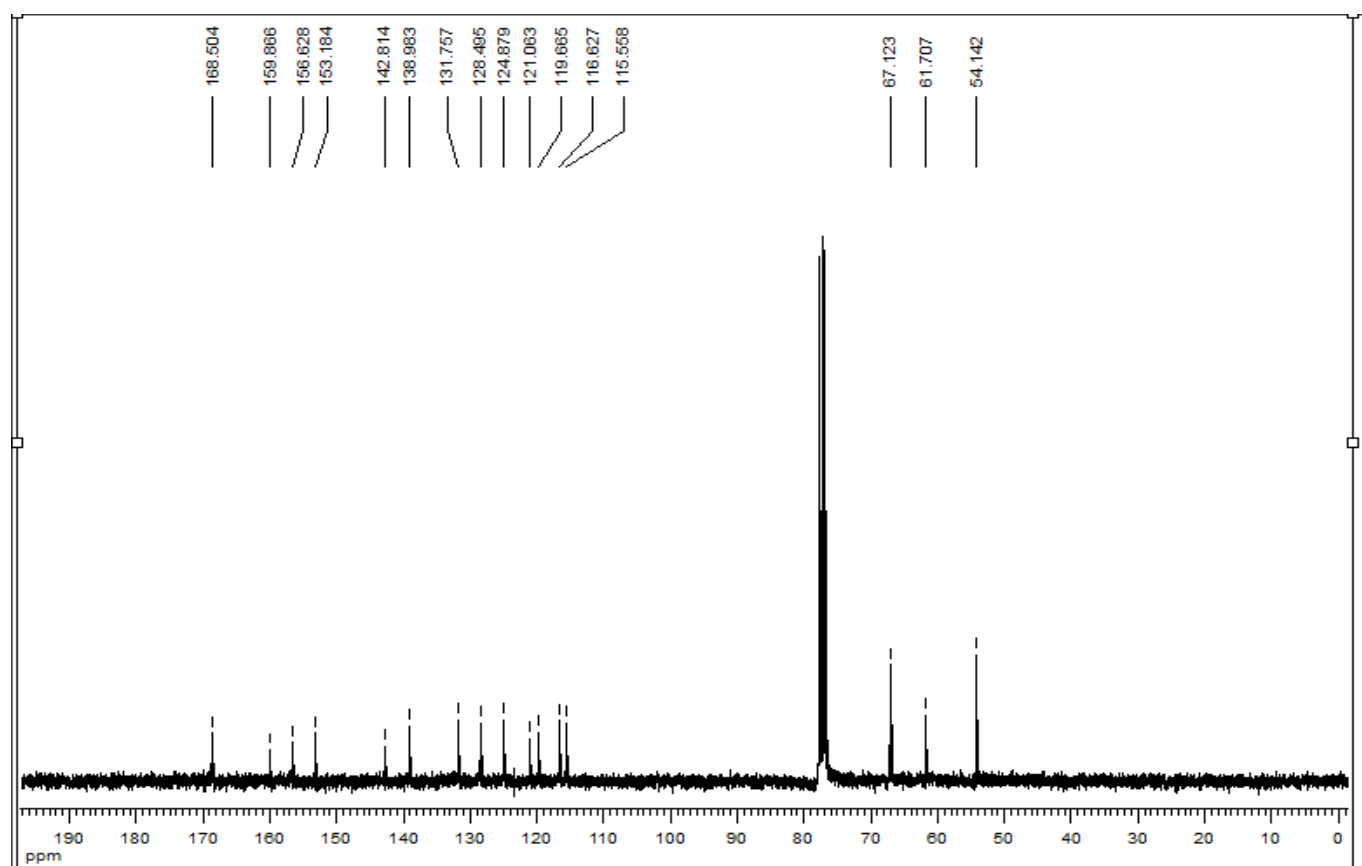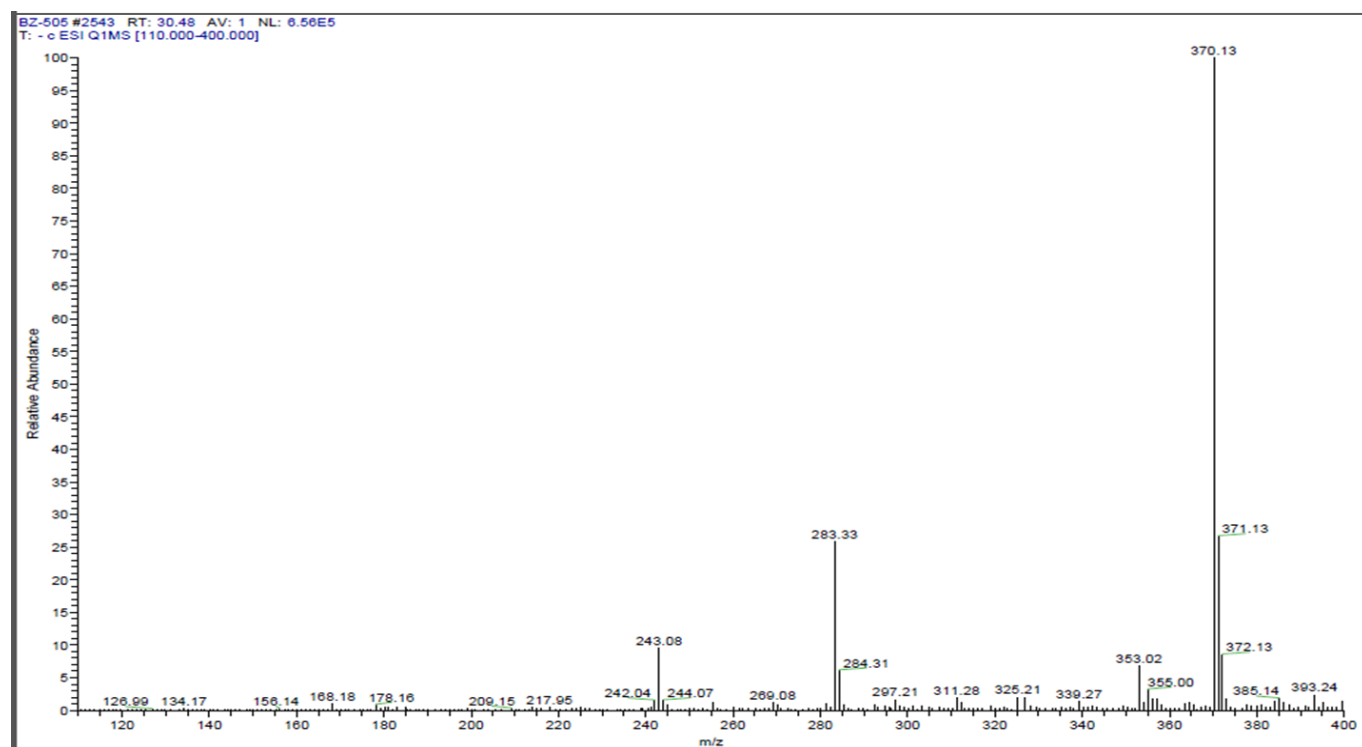

**S11:**  $^1\text{H}$  and  $^{13}\text{C}$  NMR and MS spectra of **6k**

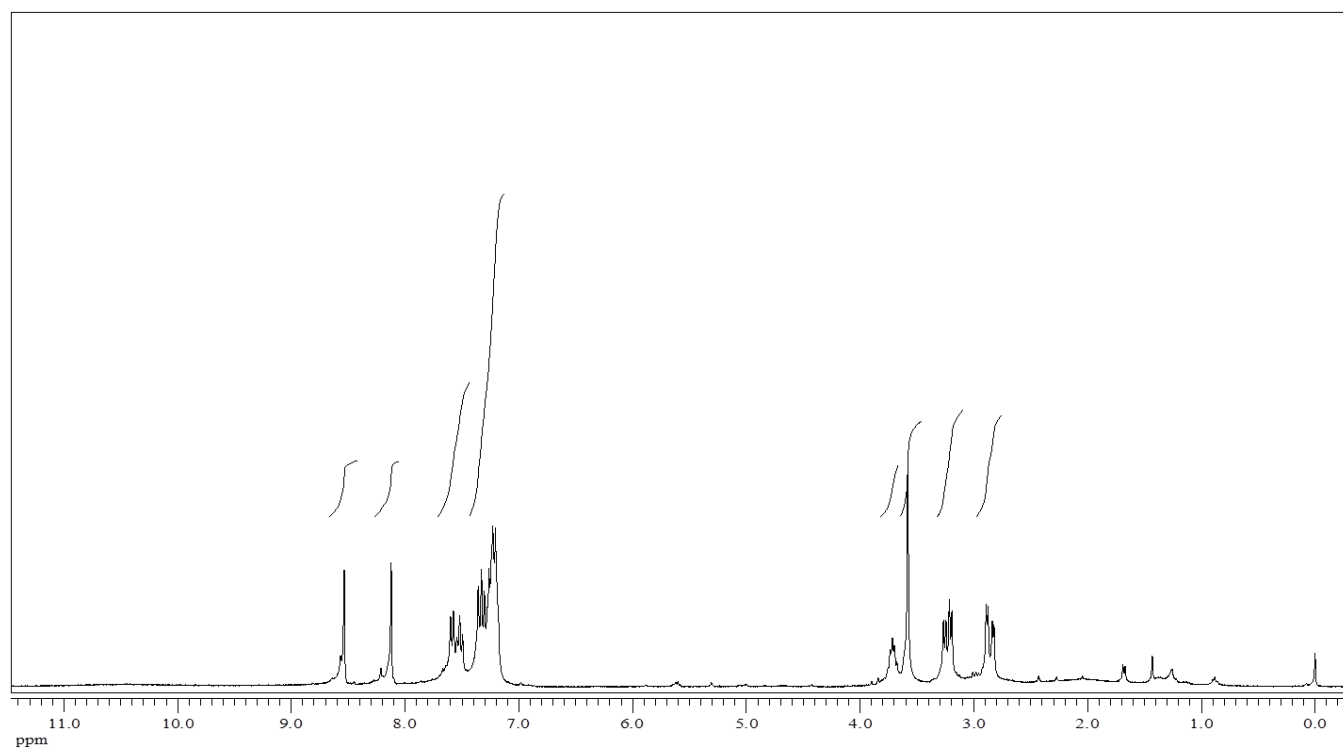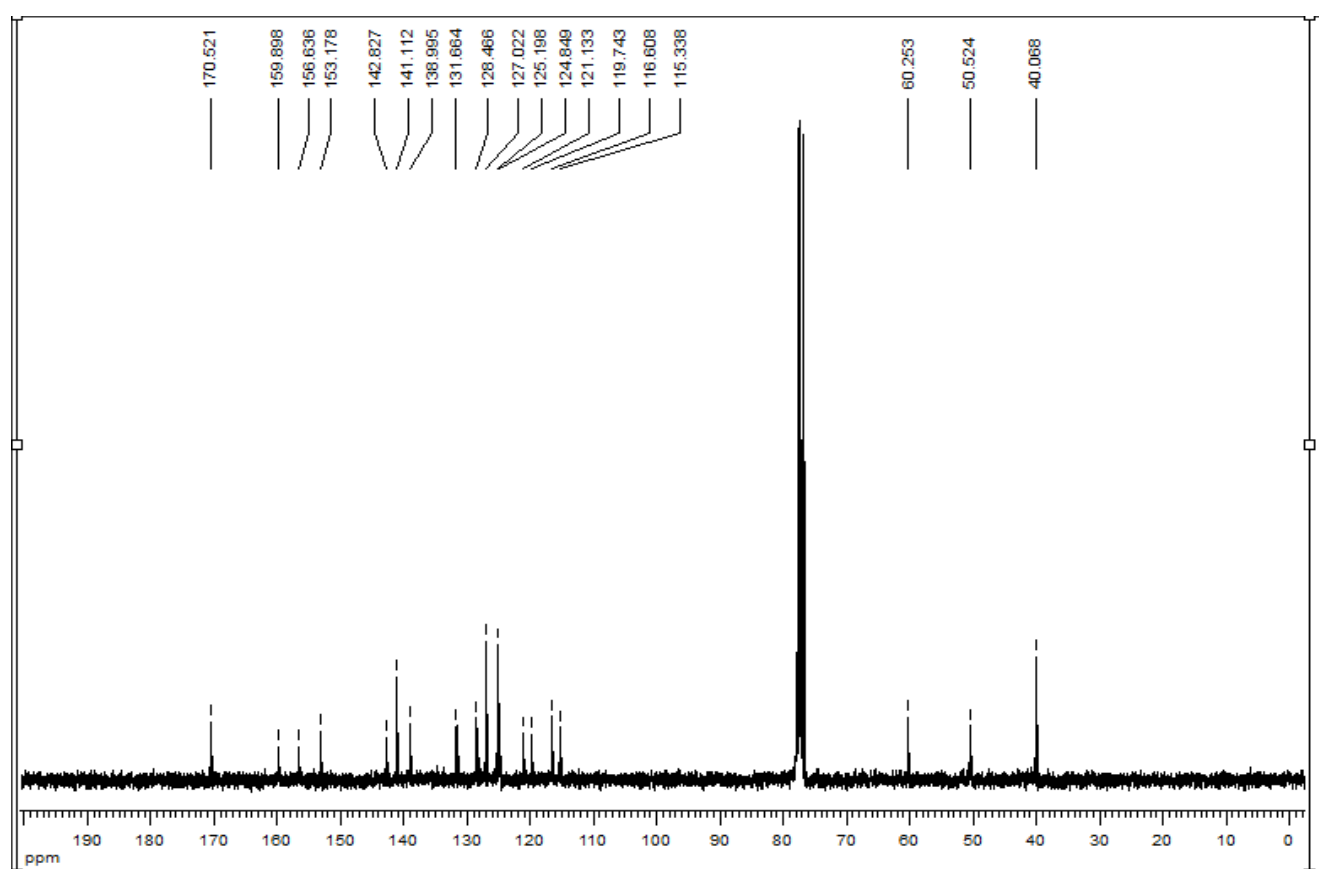

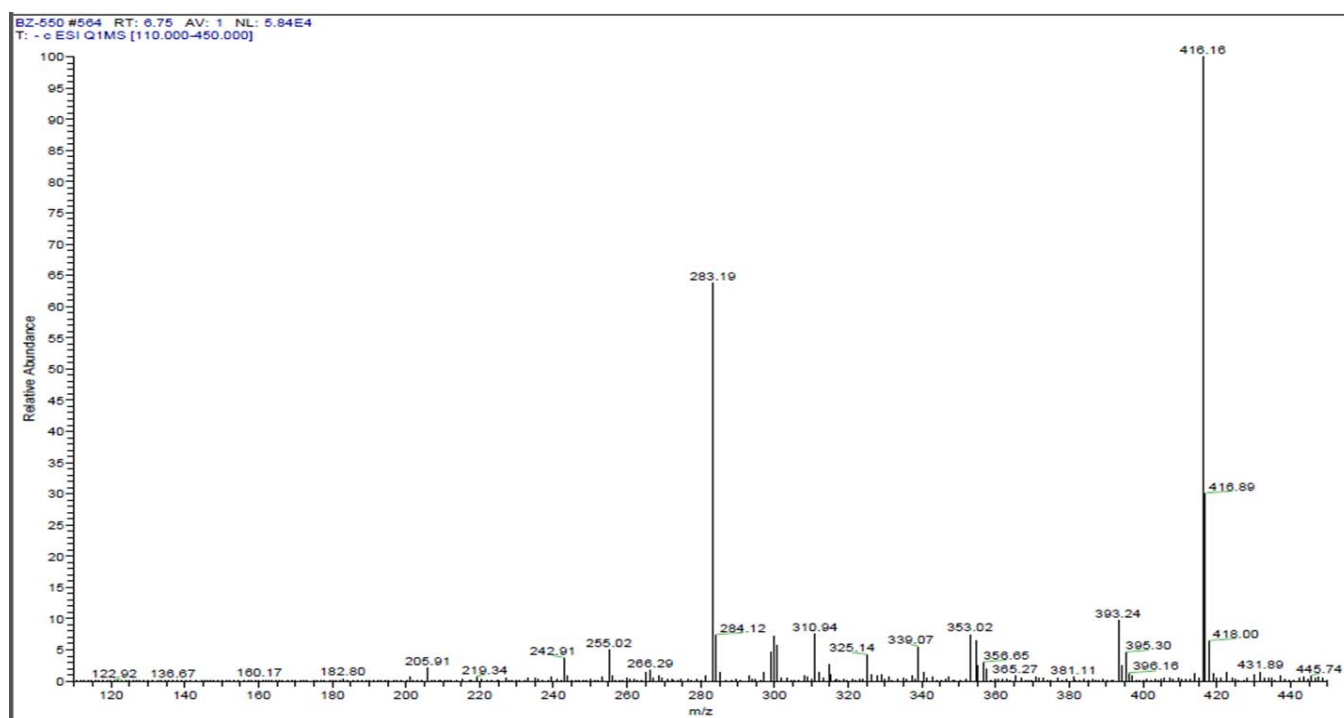

**S12:**  $^1\text{H}$  and  $^{13}\text{C}$  NMR and MS spectra of **6I**

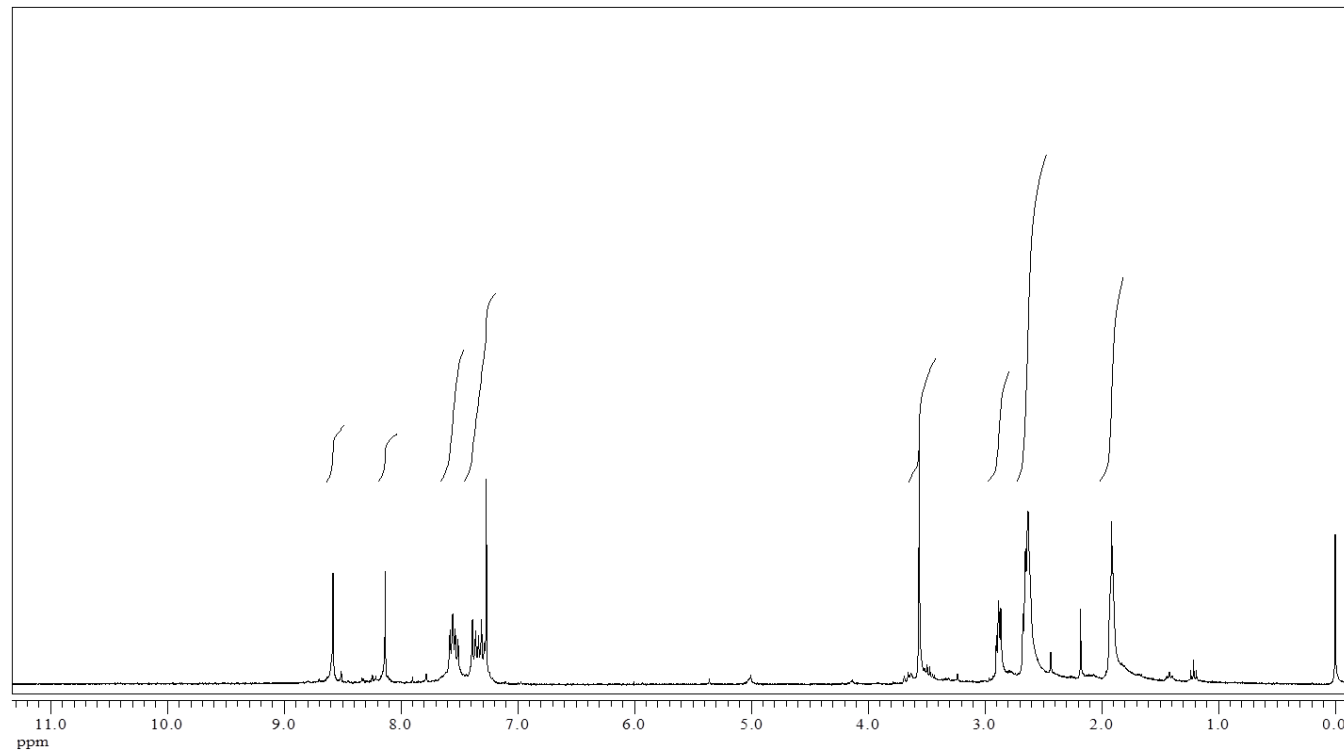

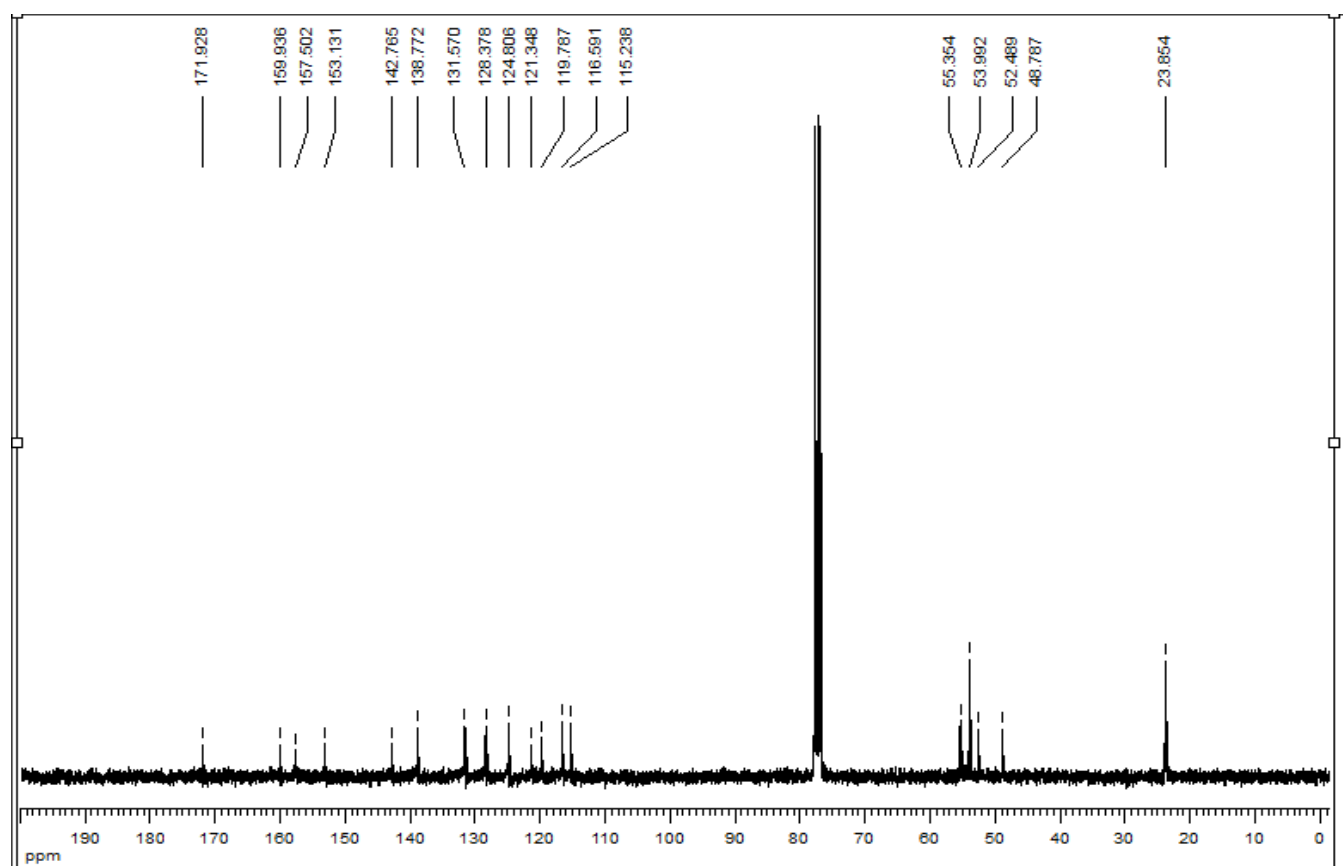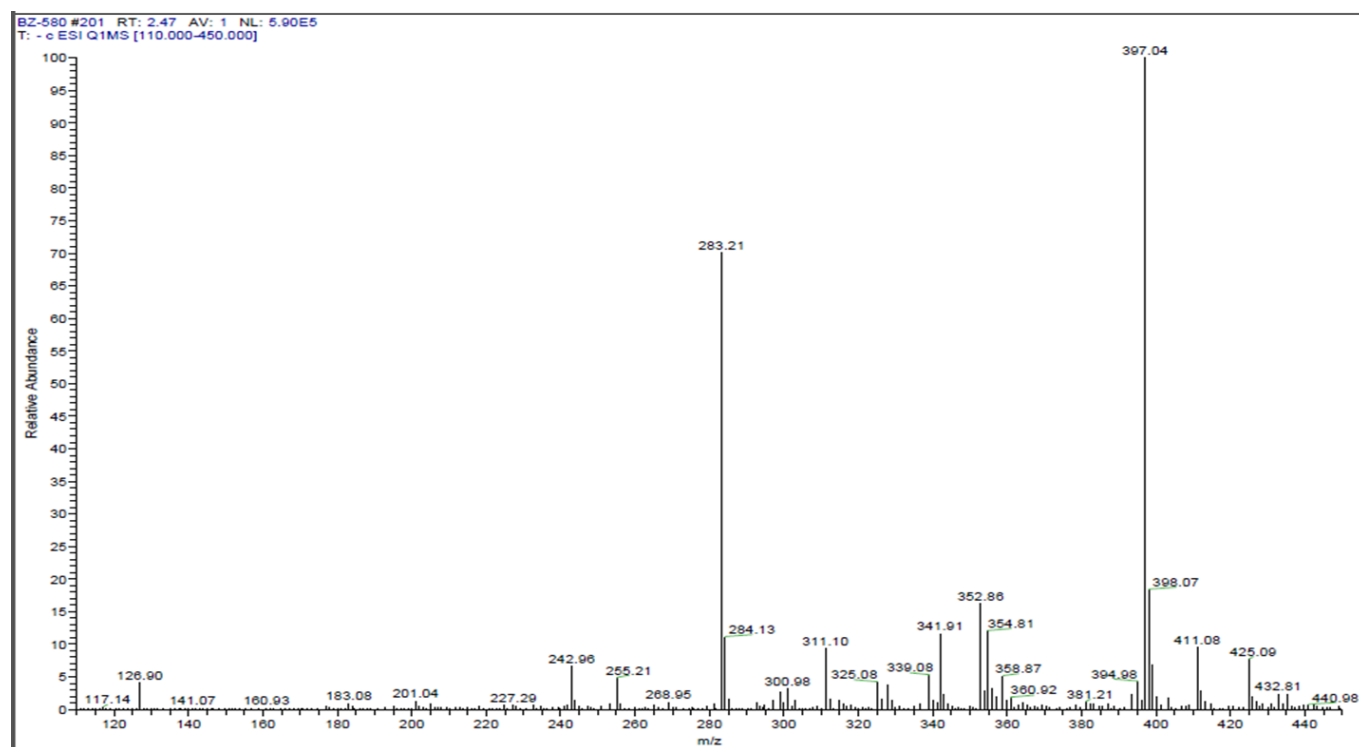

**S13:**  $^1\text{H}$  and  $^{13}\text{C}$  NMR and MS spectra of **6m**

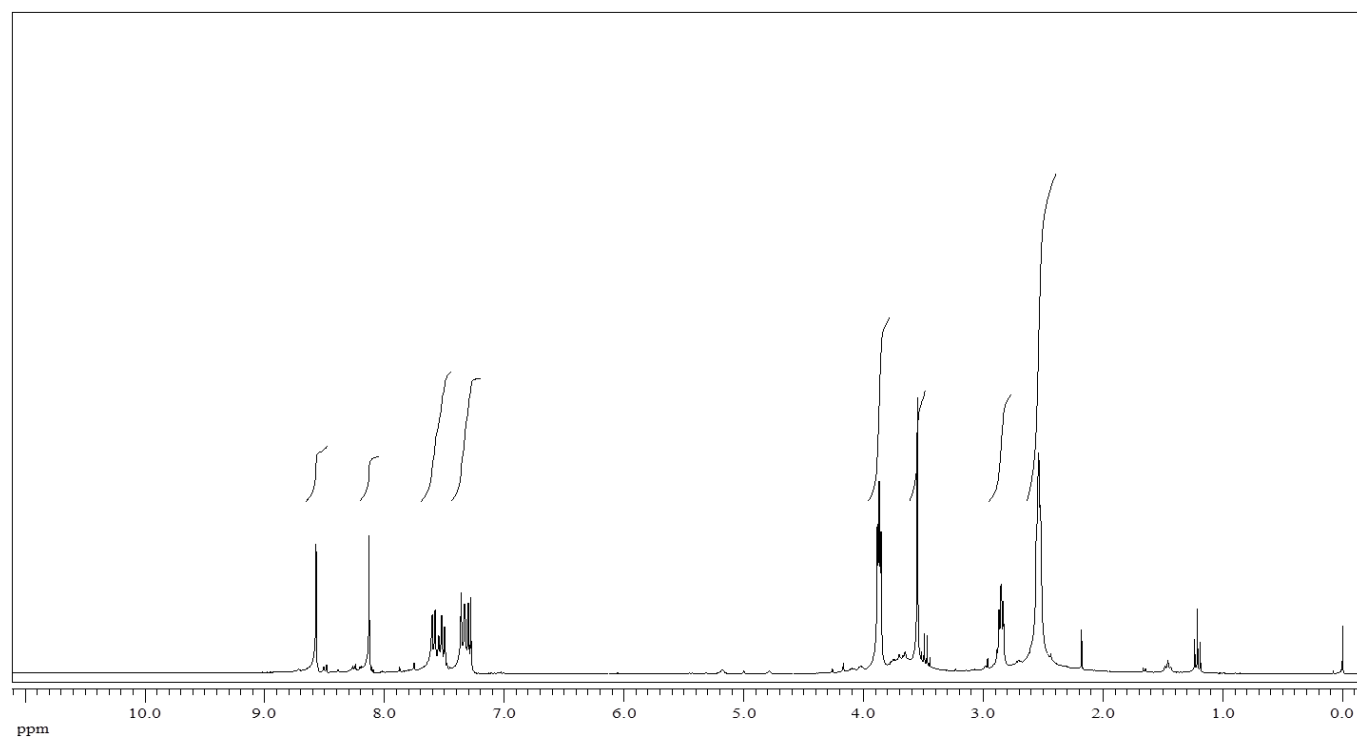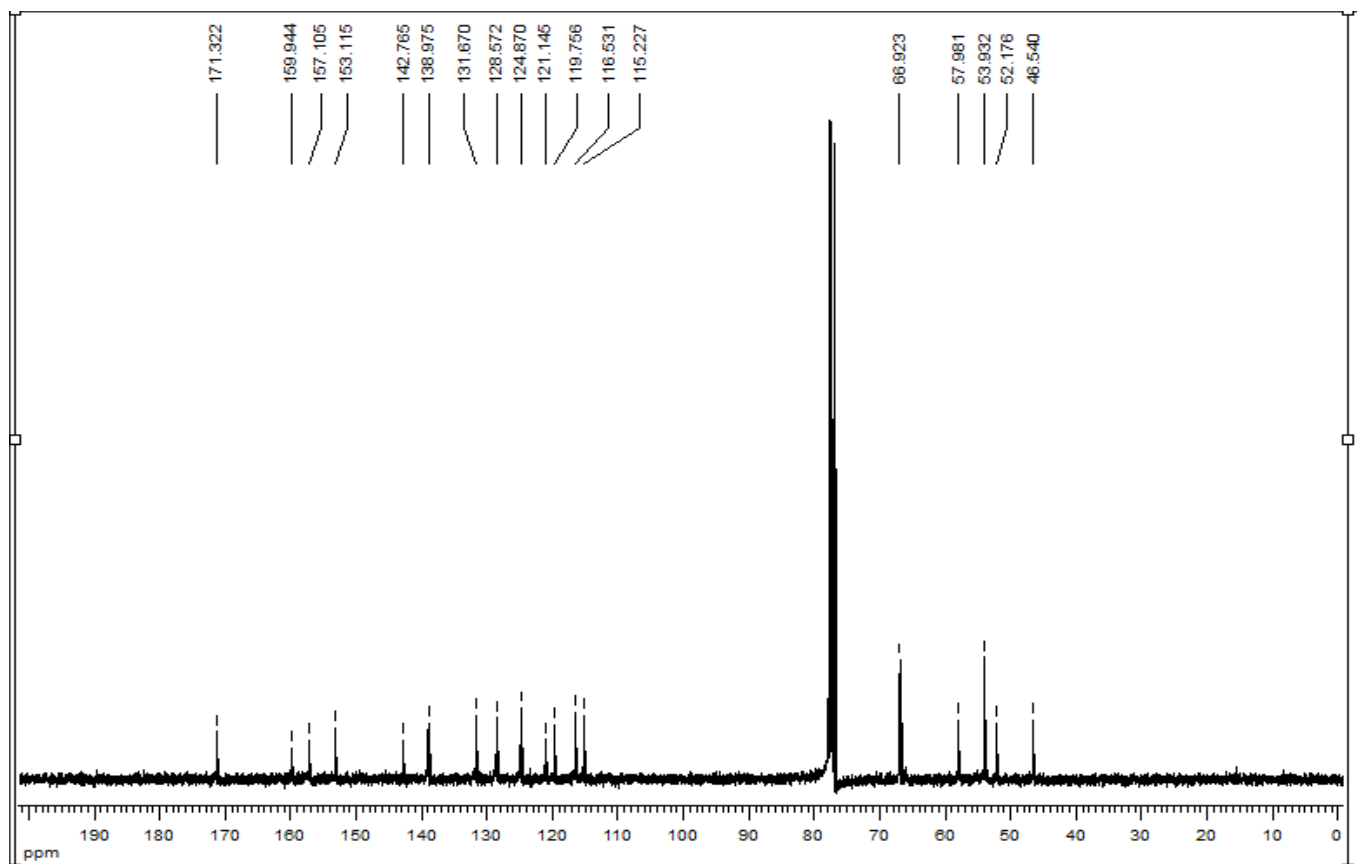

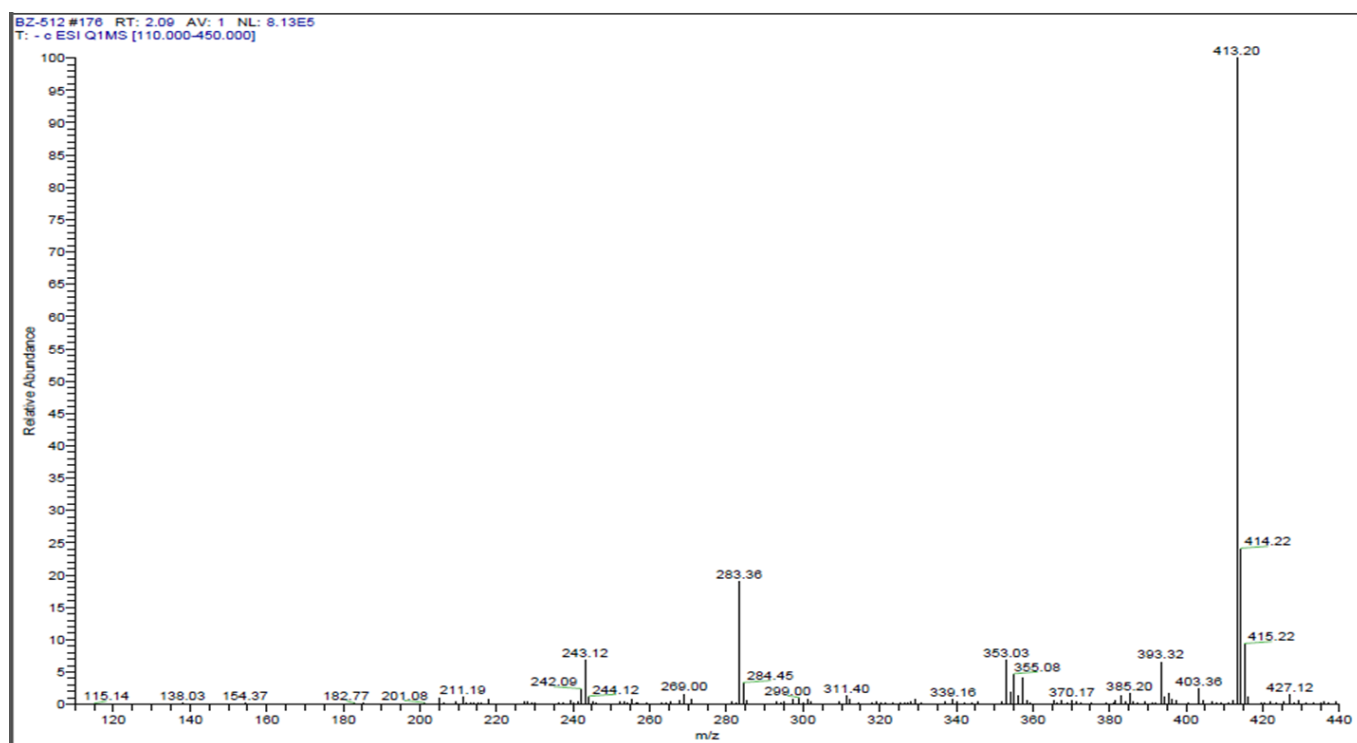

**S14:**  $^1\text{H}$  and  $^{13}\text{C}$  NMR and MS spectra of **6n**

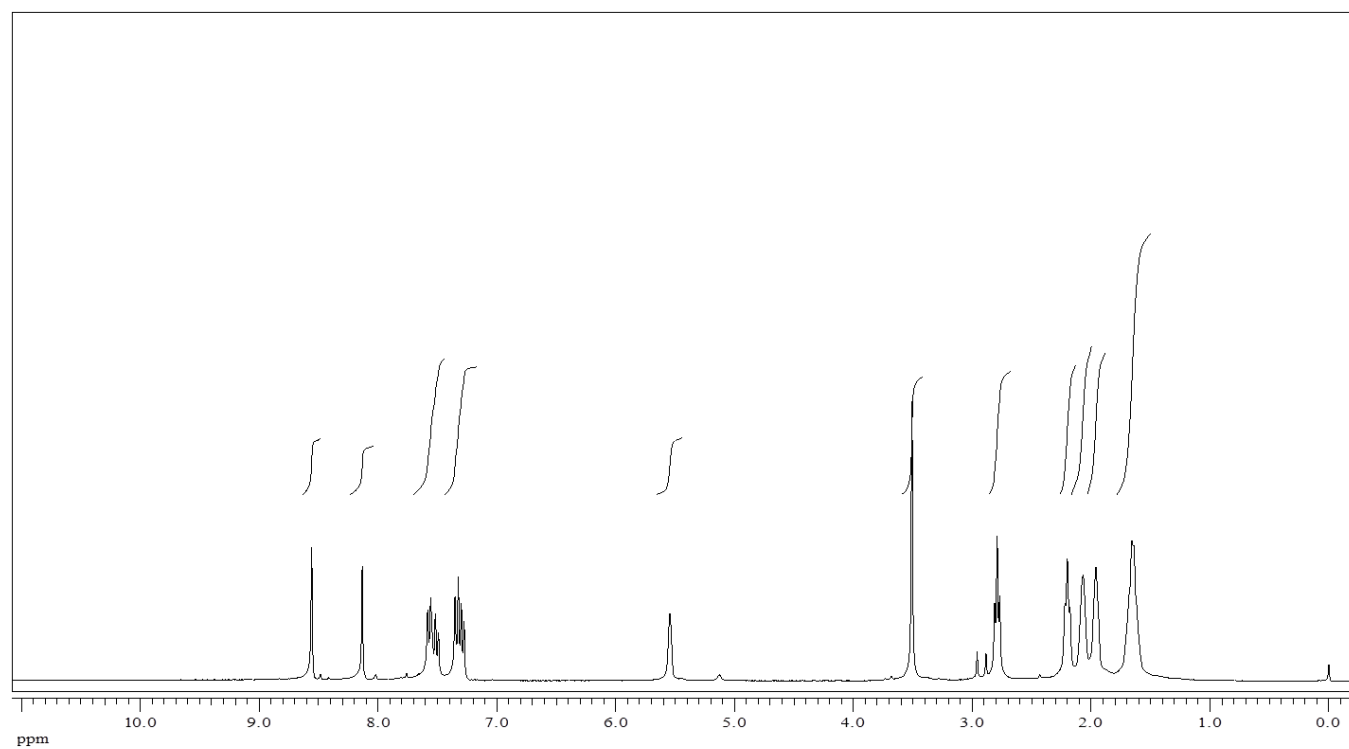

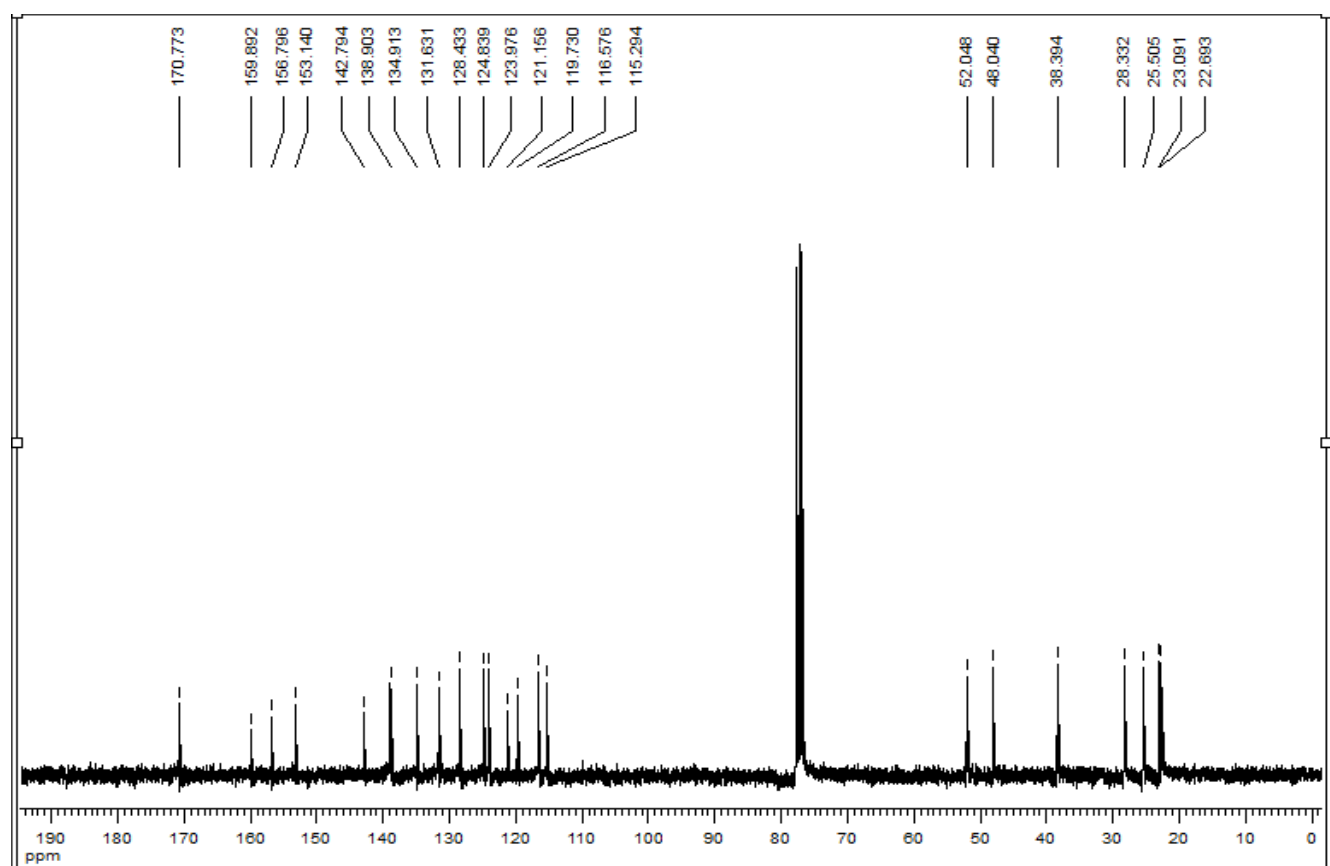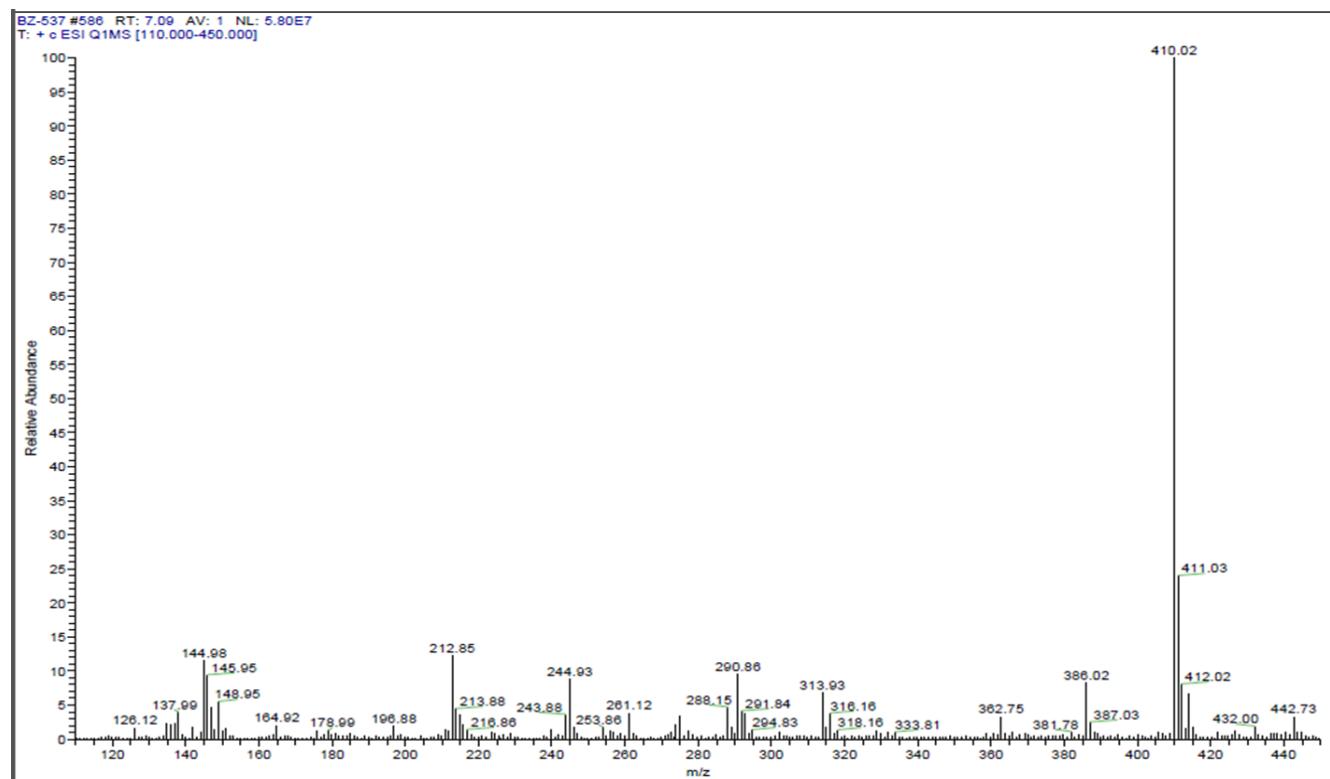

**S15:**  $^1\text{H}$  and  $^{13}\text{C}$  NMR and MS spectra of **60**

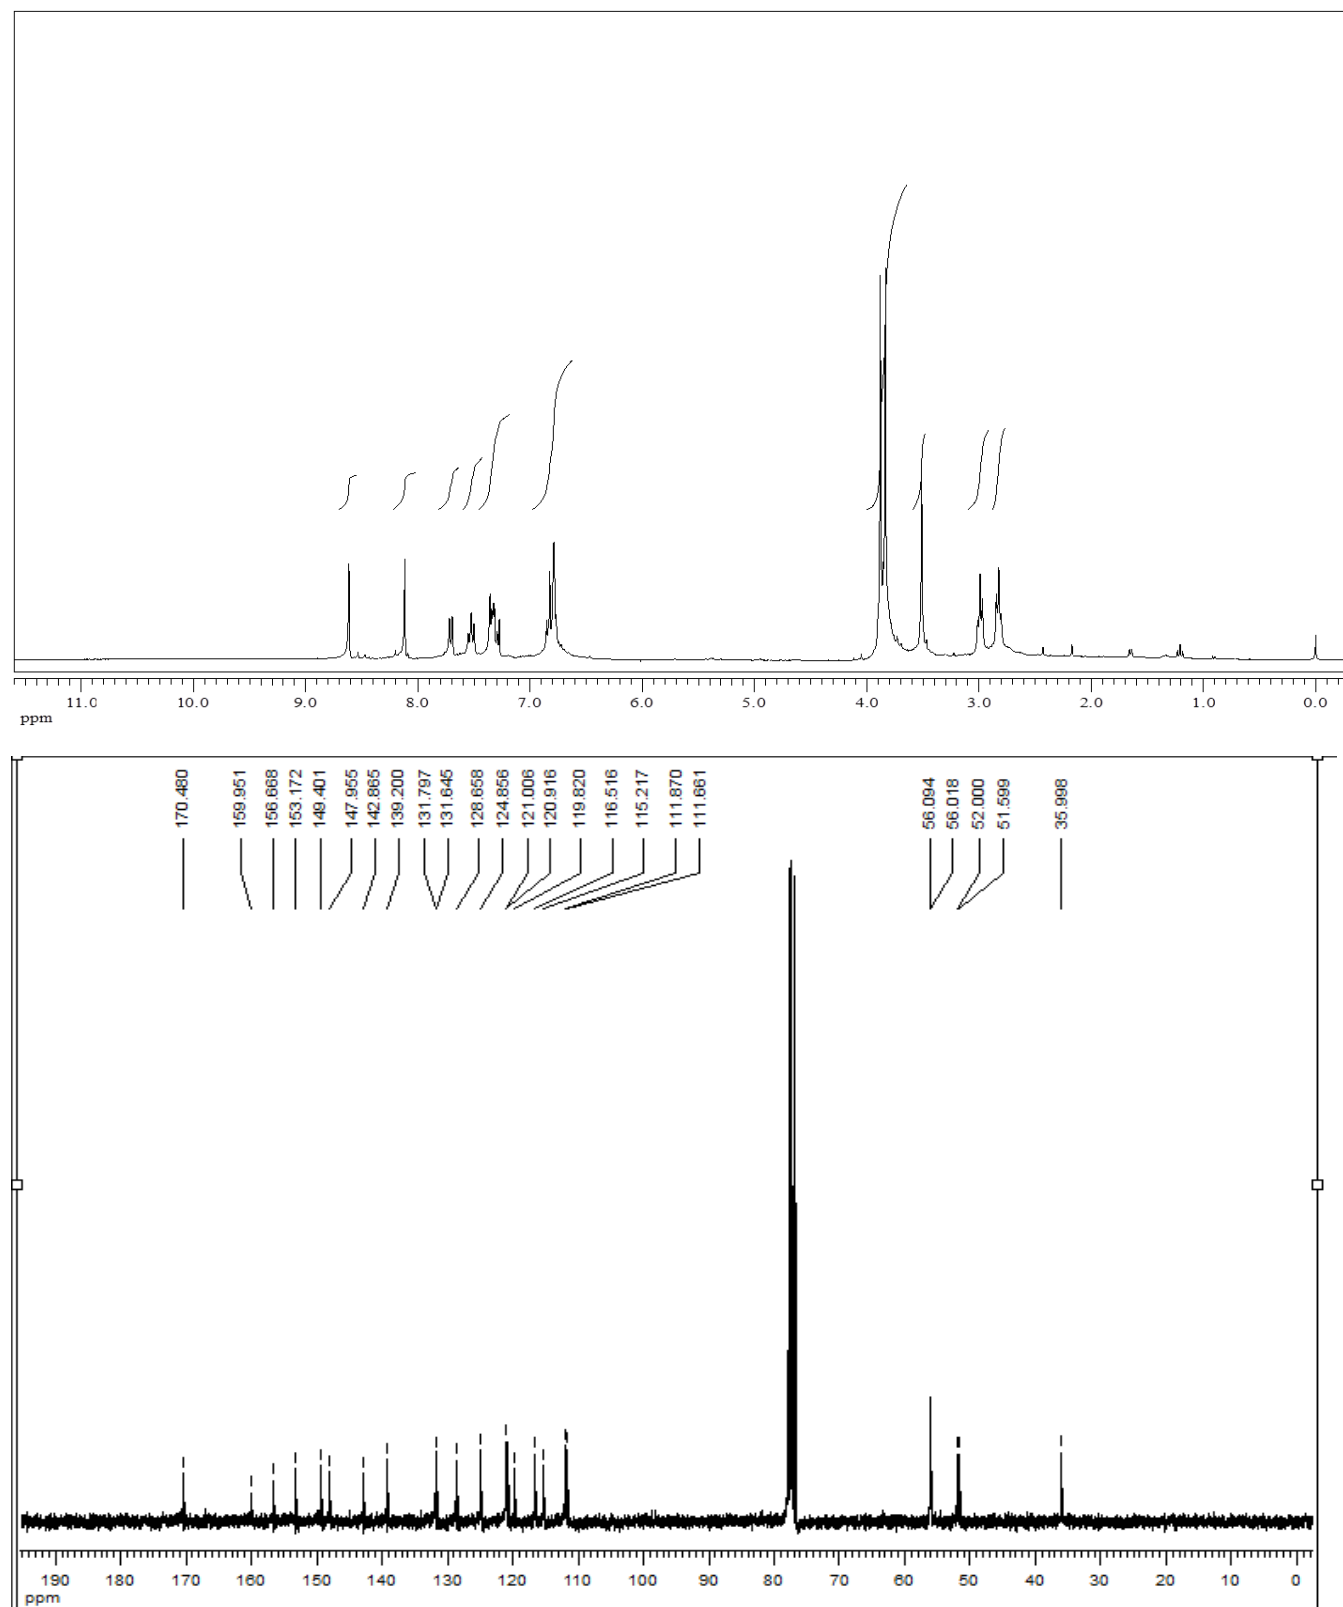

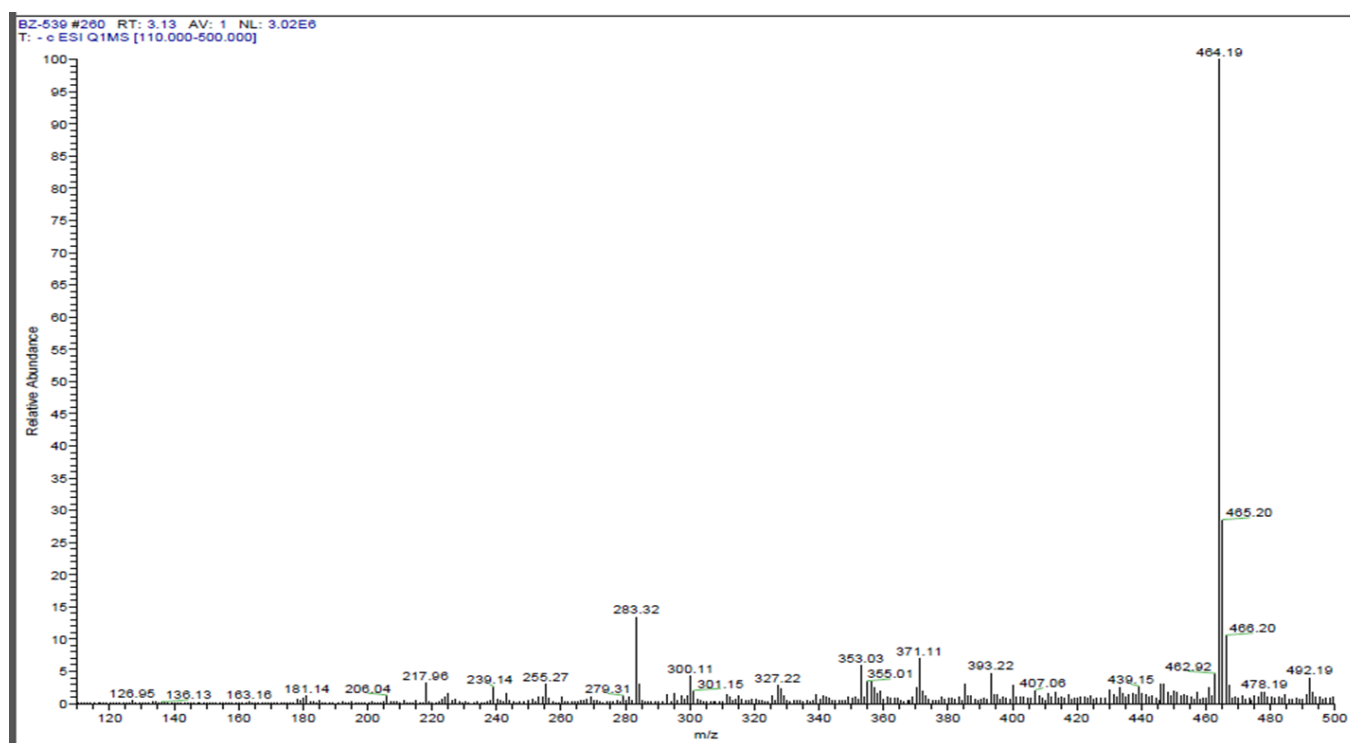

**S16:**  $^1\text{H}$  and  $^{13}\text{C}$  NMR and MS spectra of **6p**

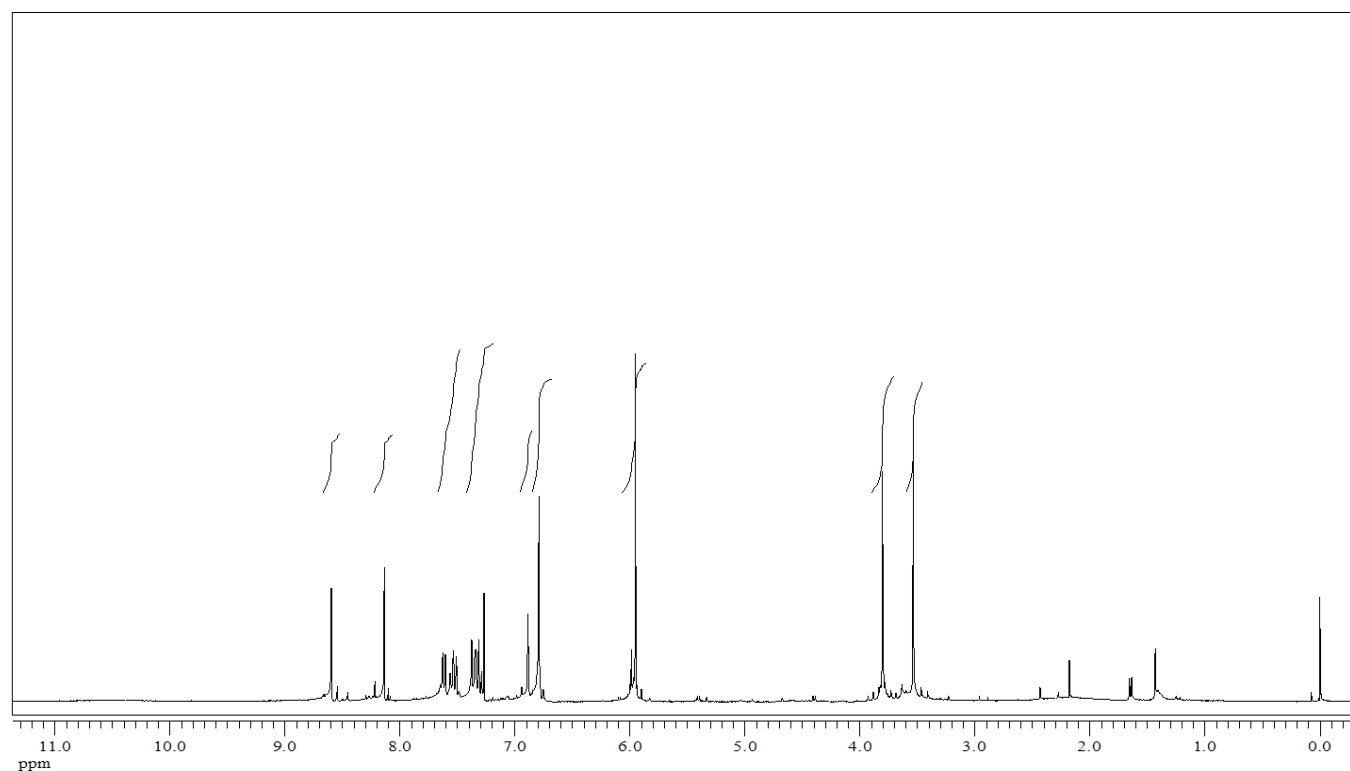

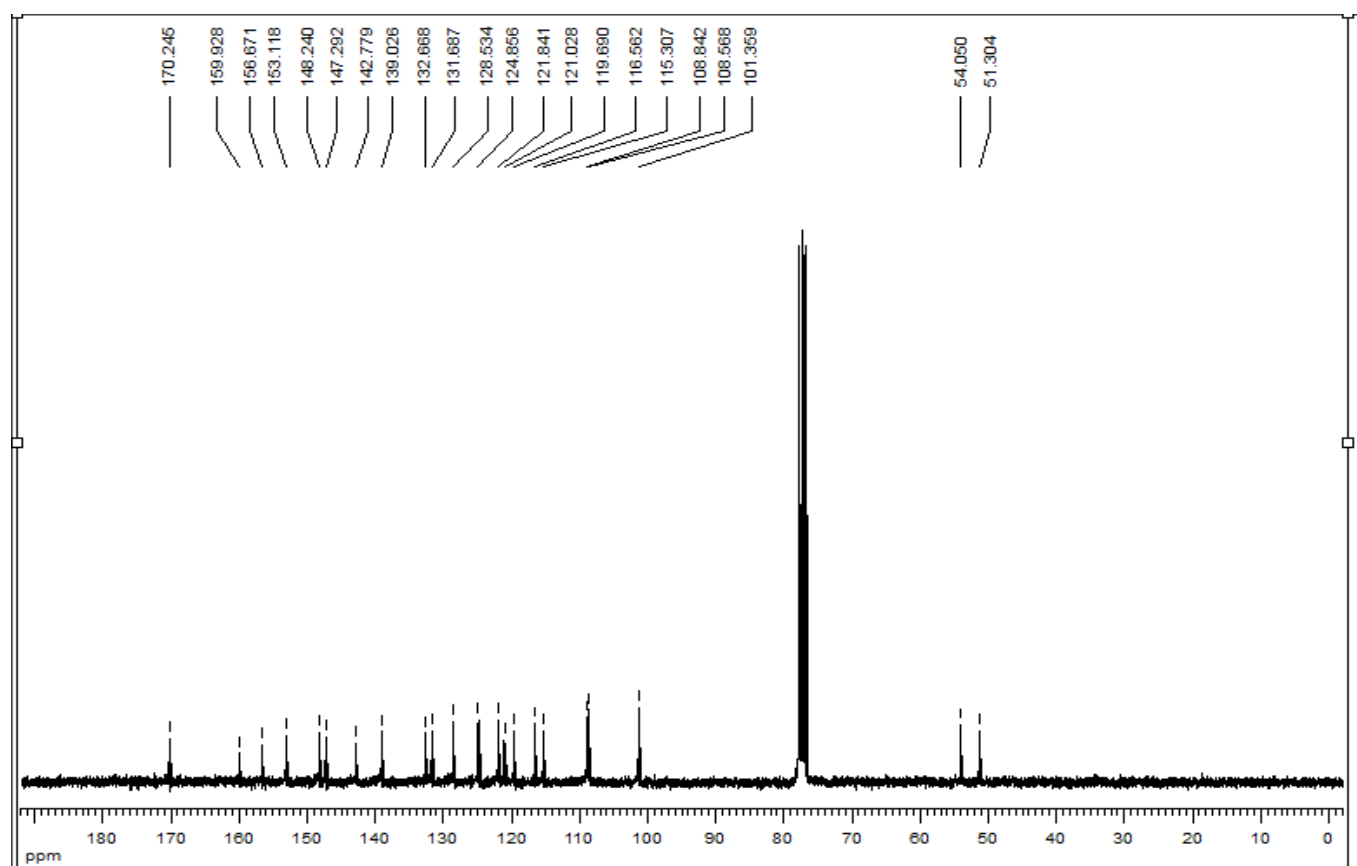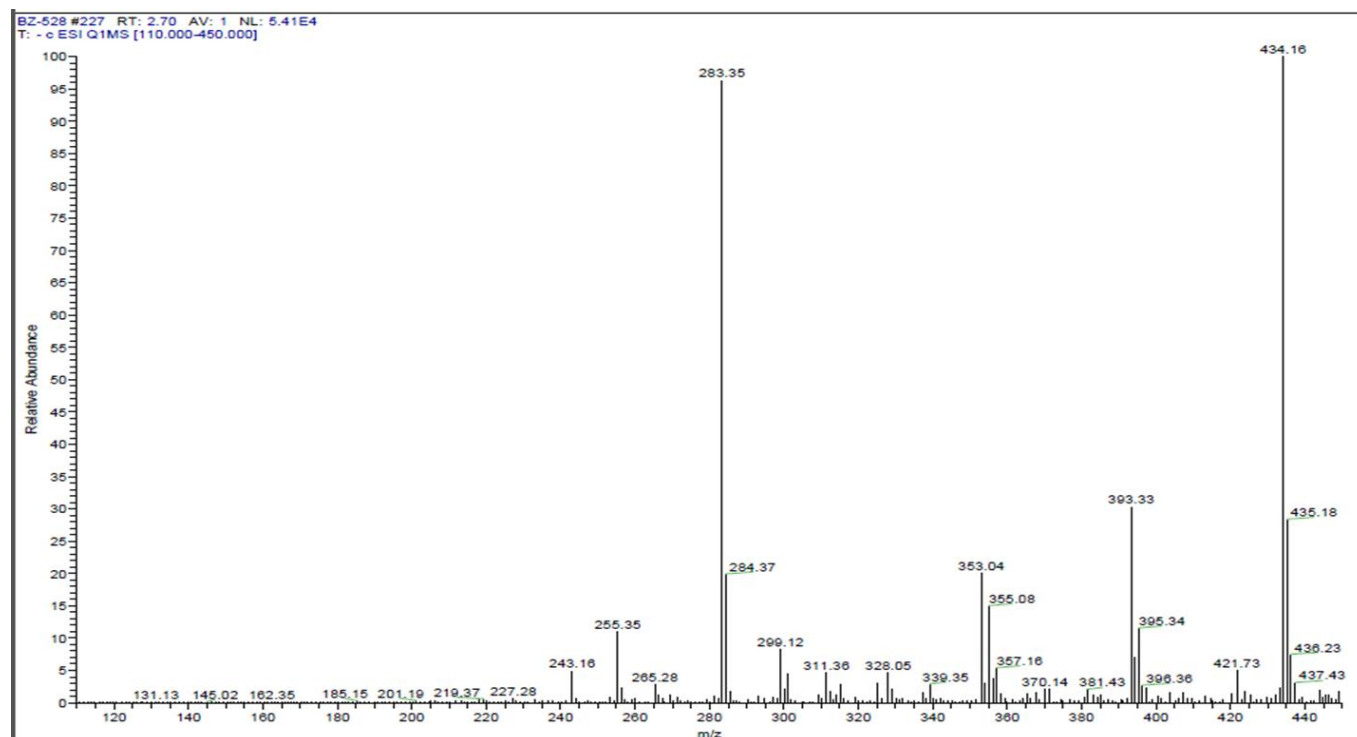

**S17:**  $^1\text{H}$  and  $^{13}\text{C}$  NMR and MS spectra of **6q**

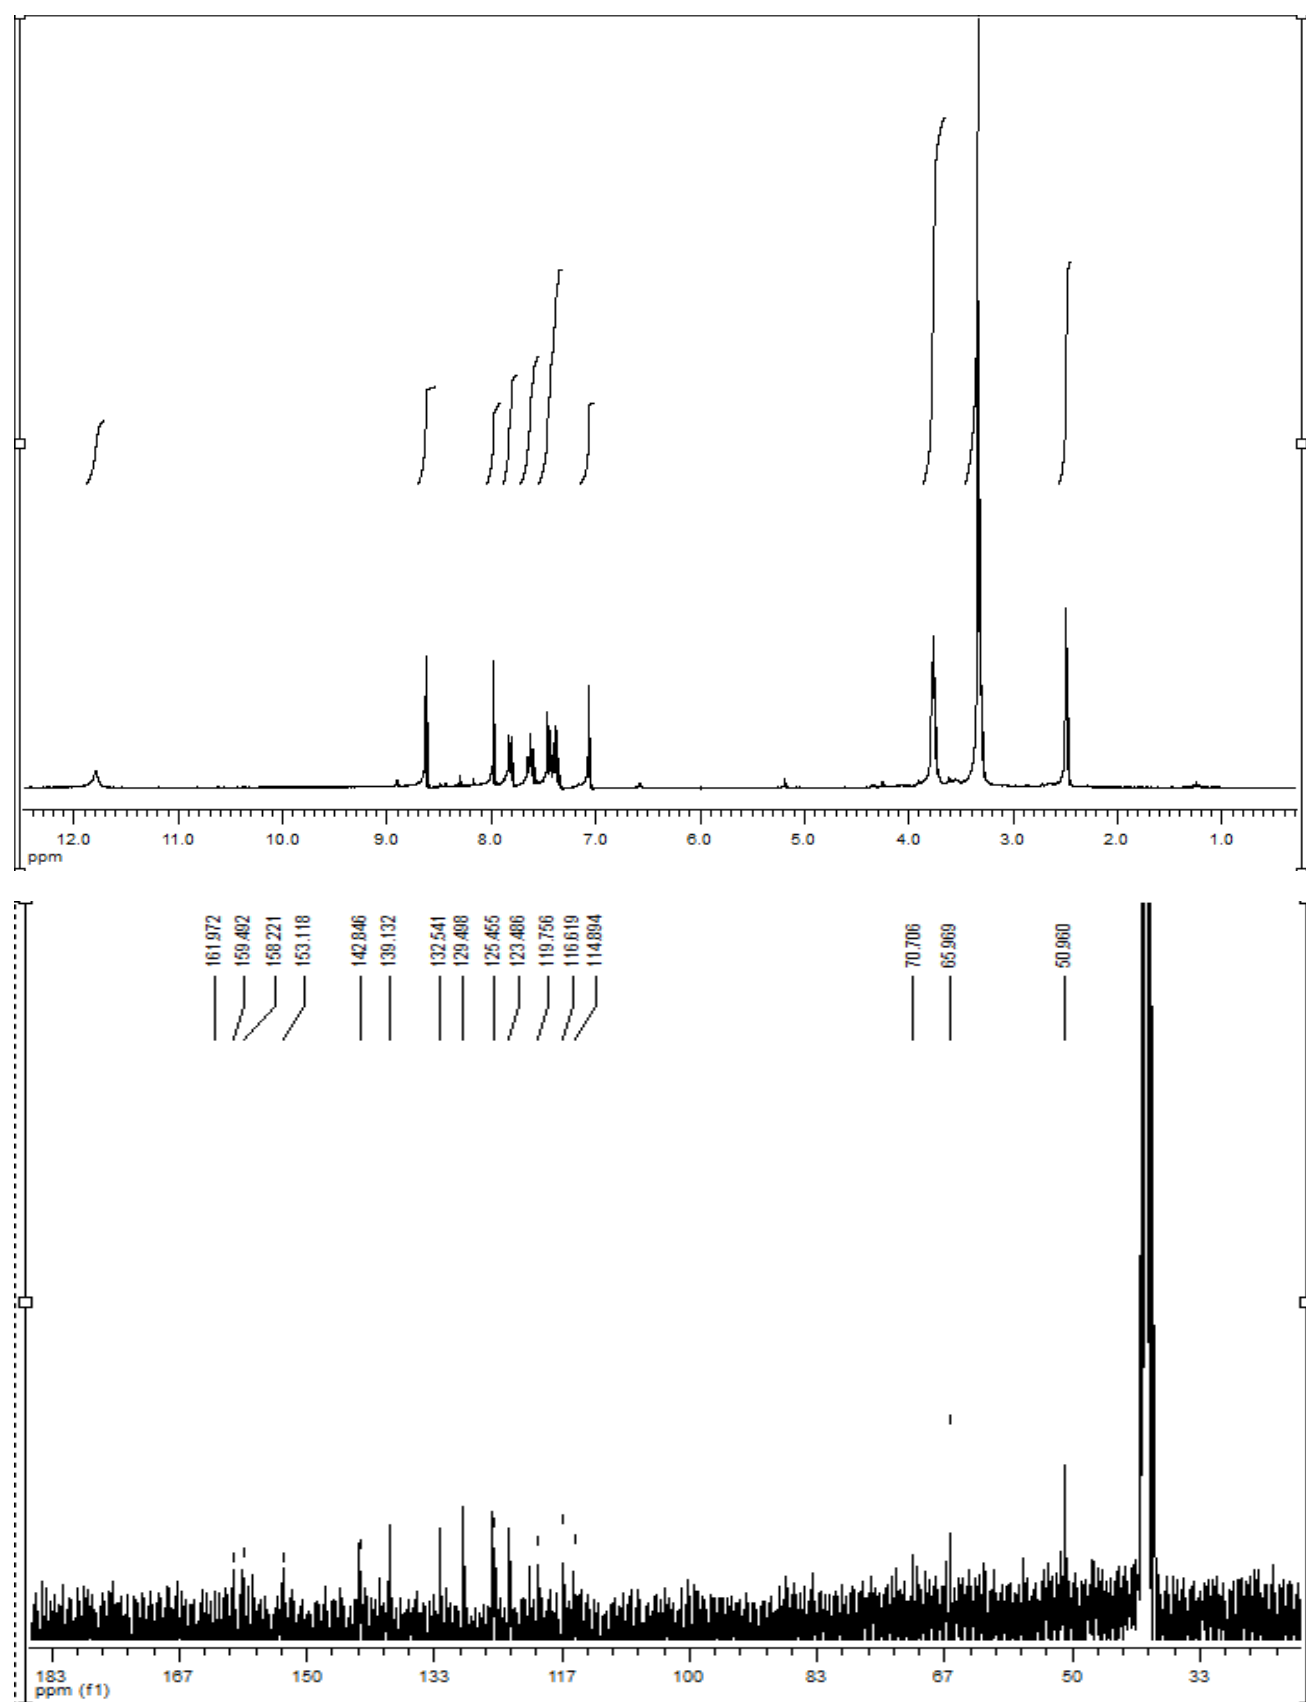

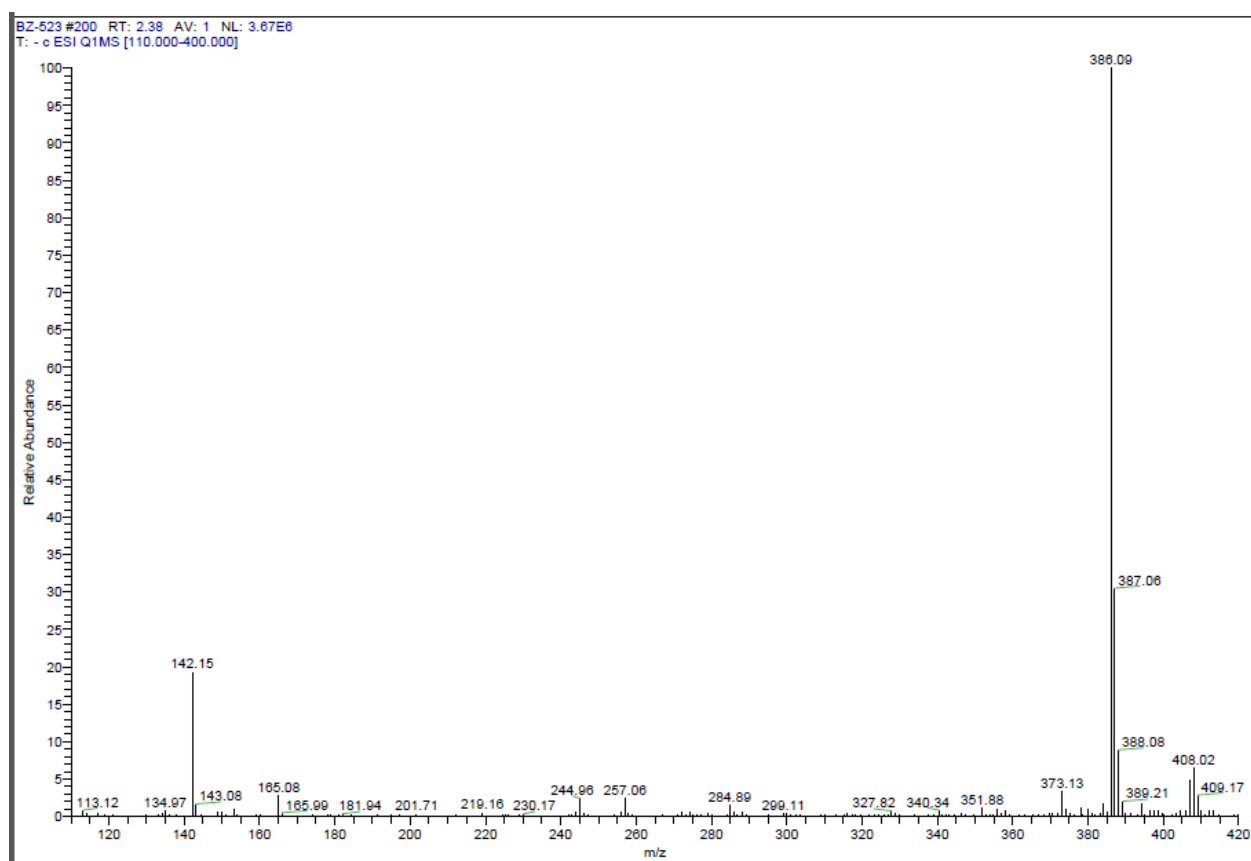

**S18:**  $^1\text{H}$  and  $^{13}\text{C}$  NMR and MS spectra of **6r**

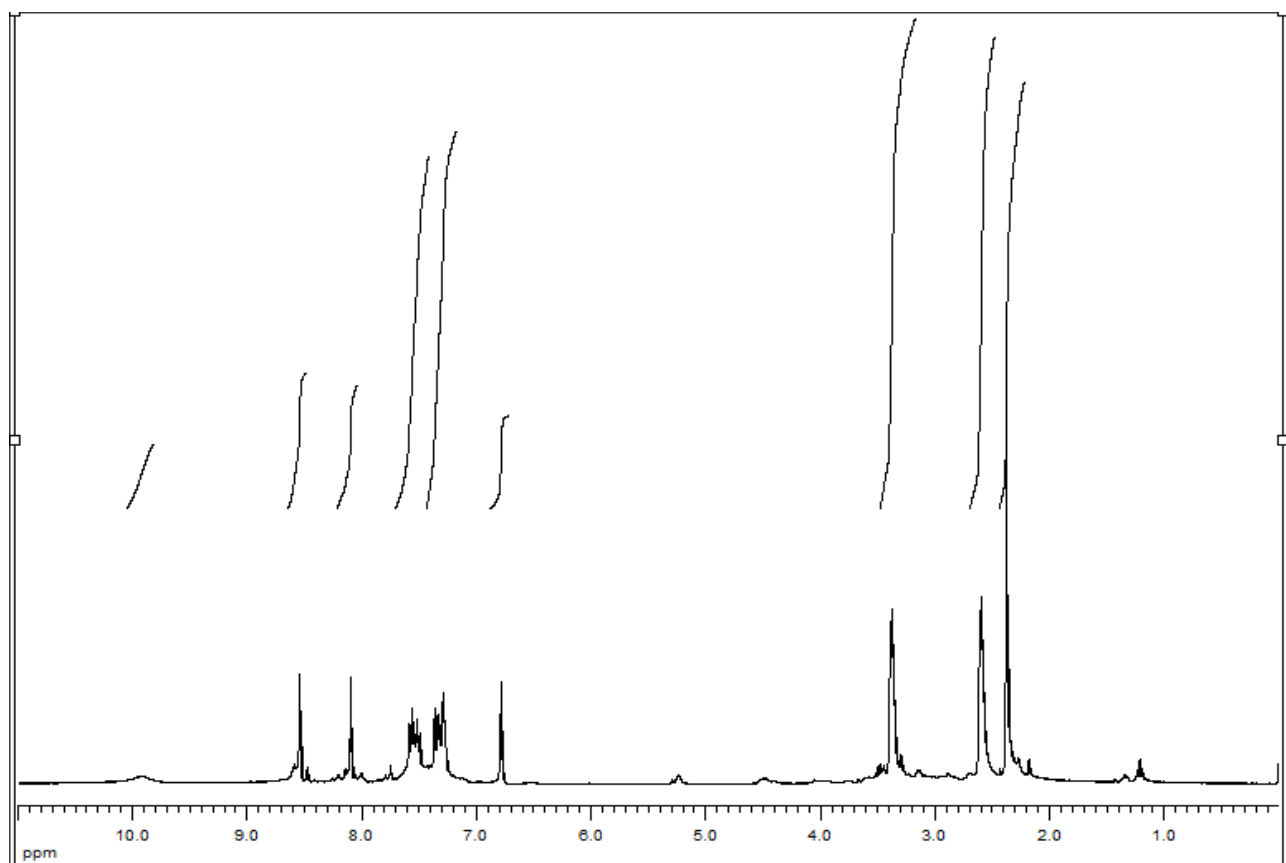

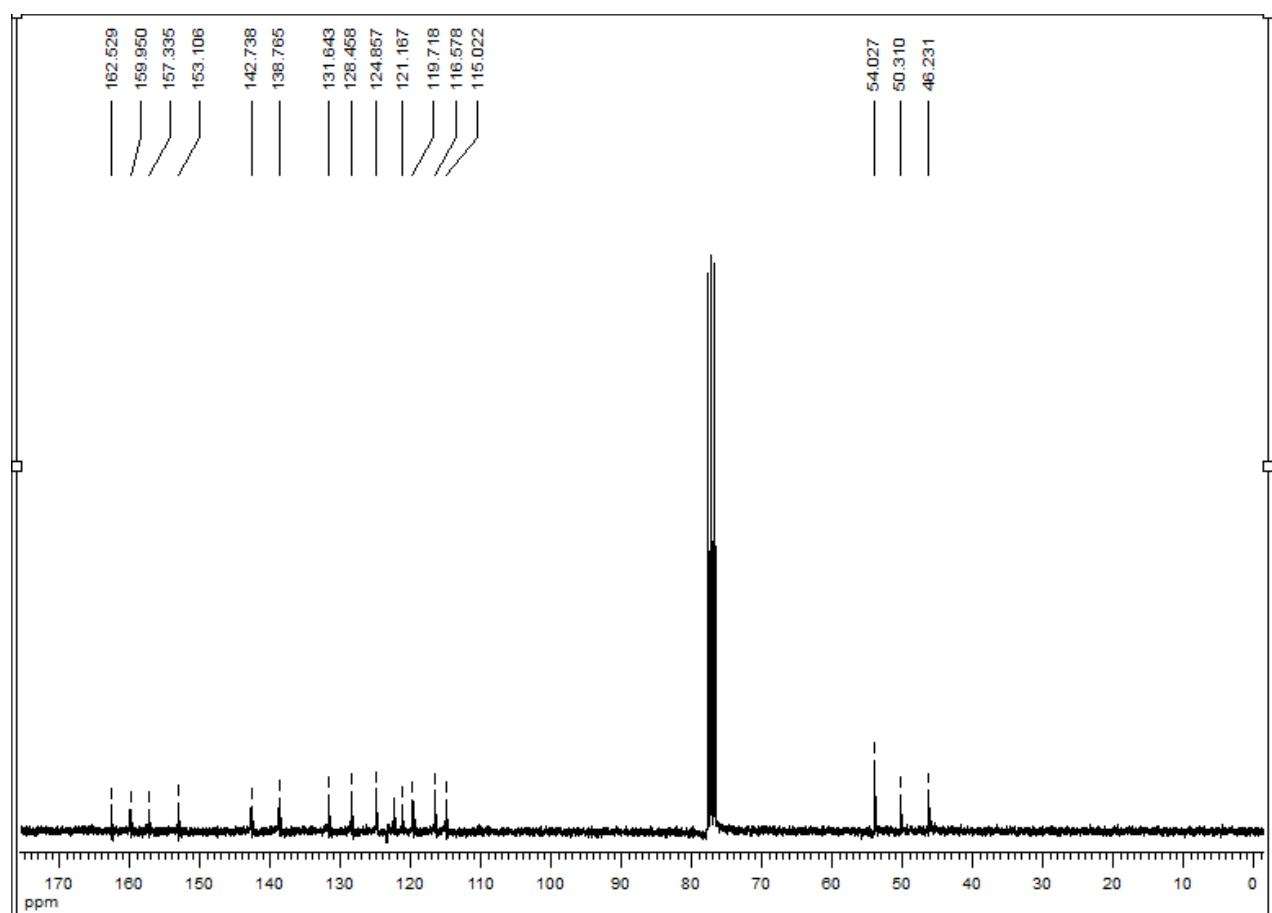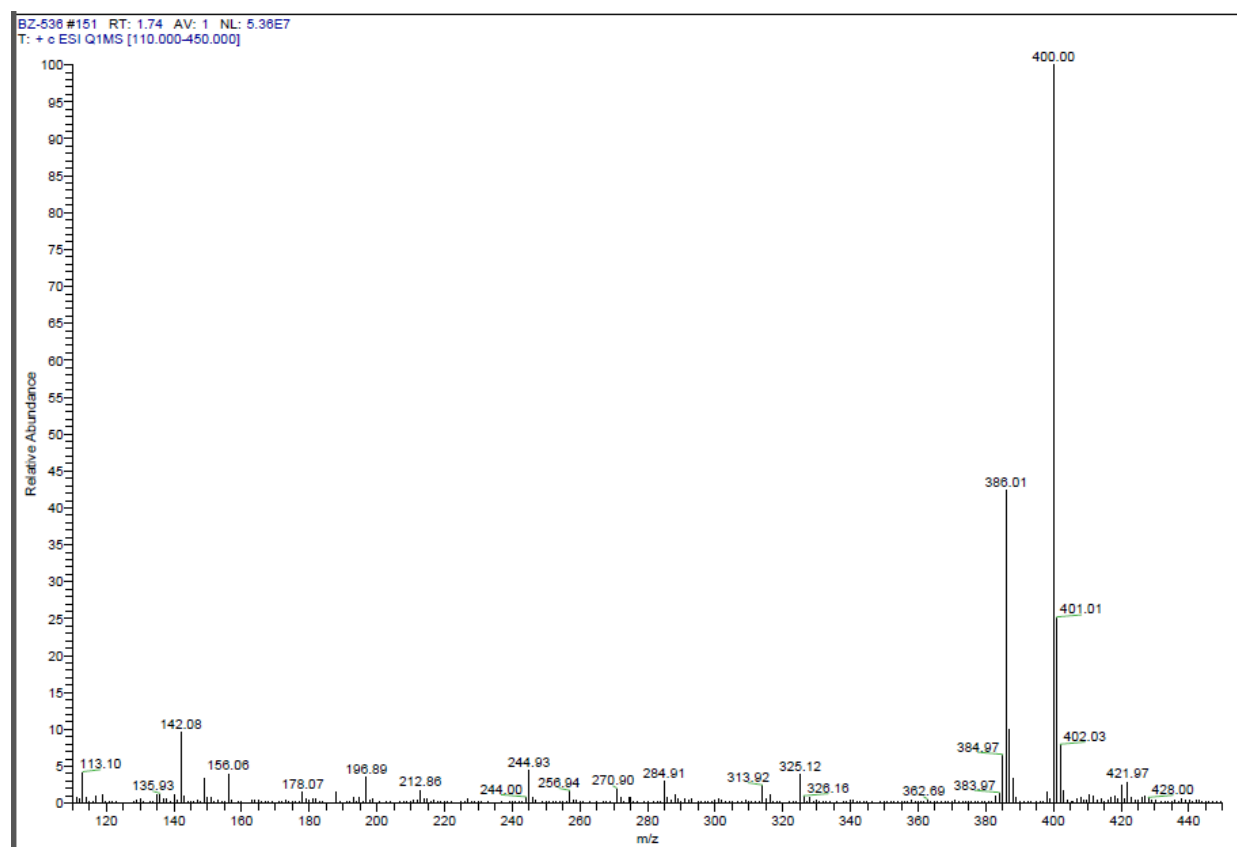

**S19:**  $^1\text{H}$  and  $^{13}\text{C}$  NMR and MS spectra of **6s**

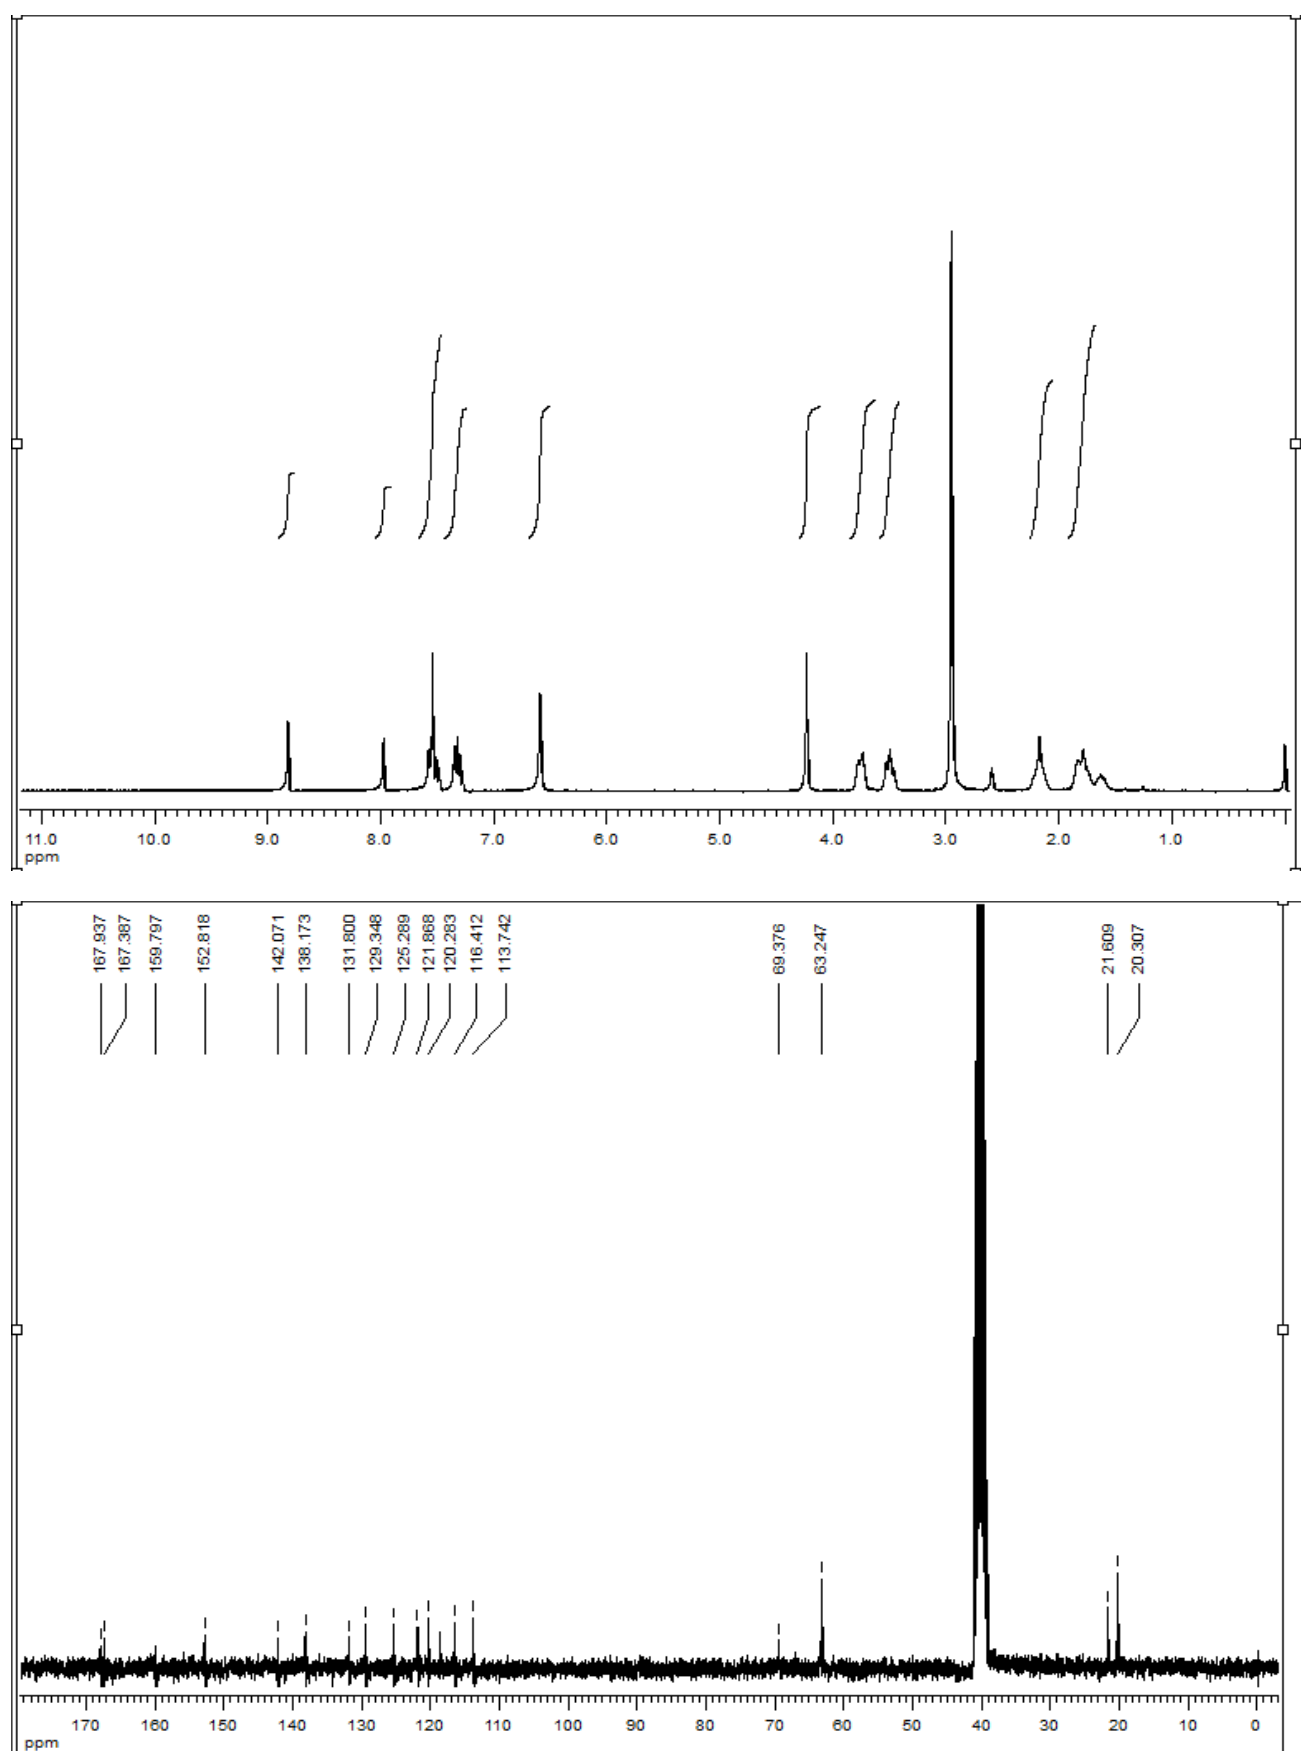

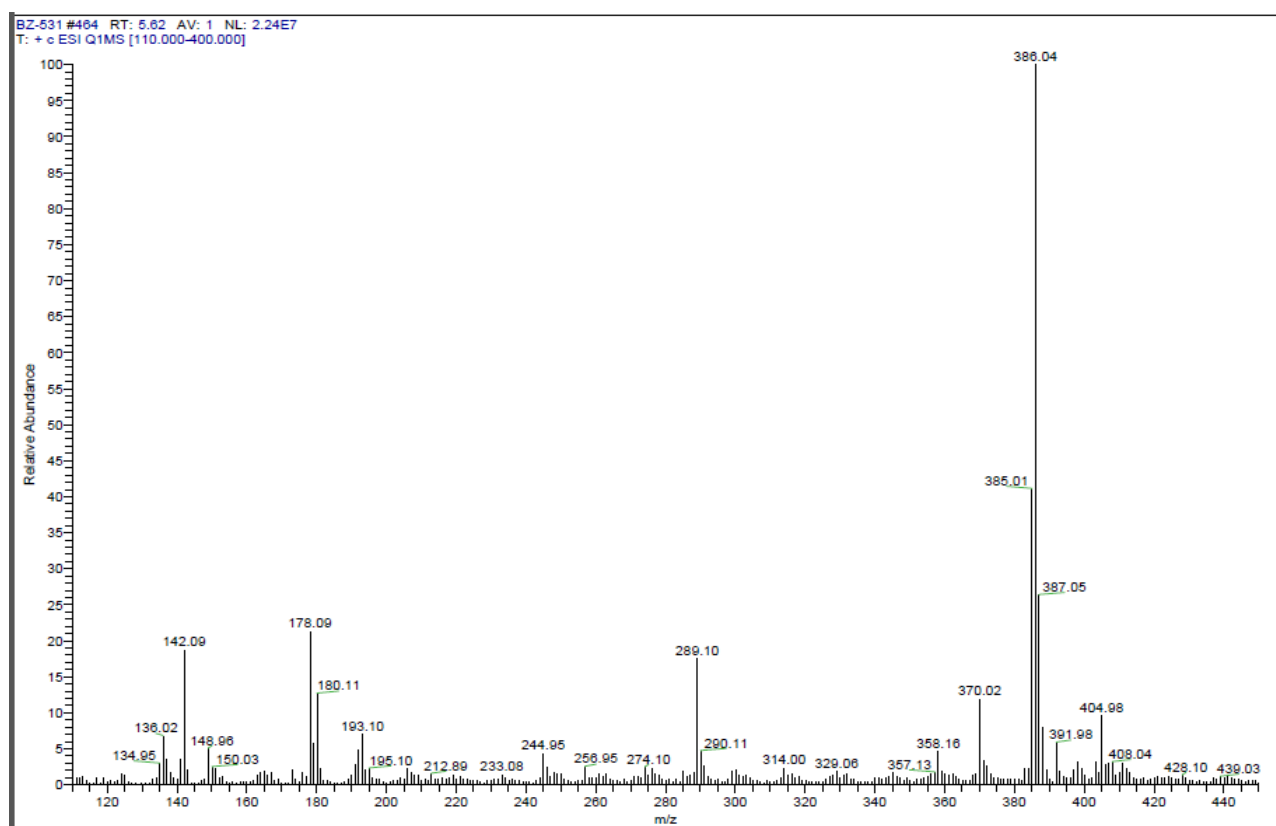

**S20:**  $^1\text{H}$  and  $^{13}\text{C}$  NMR and MS spectra of **6t**

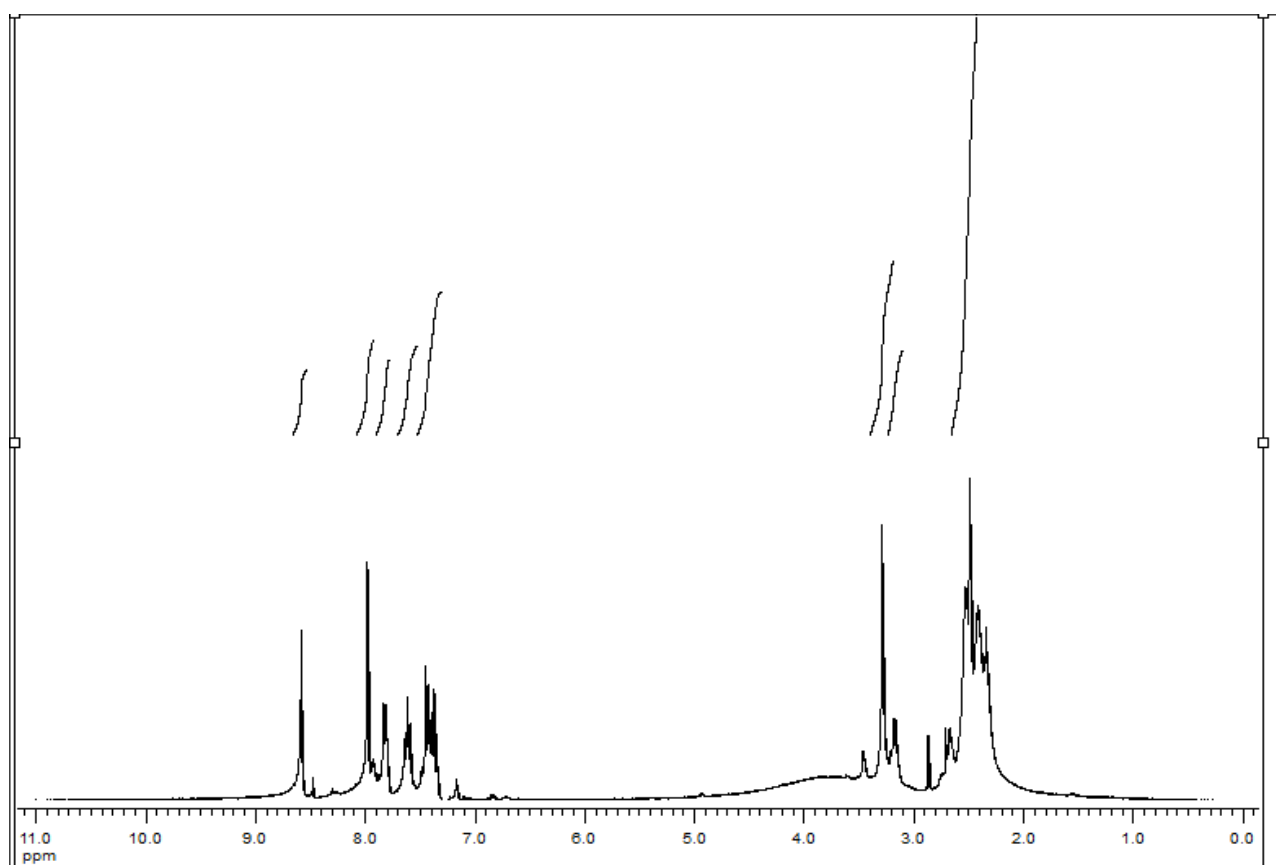

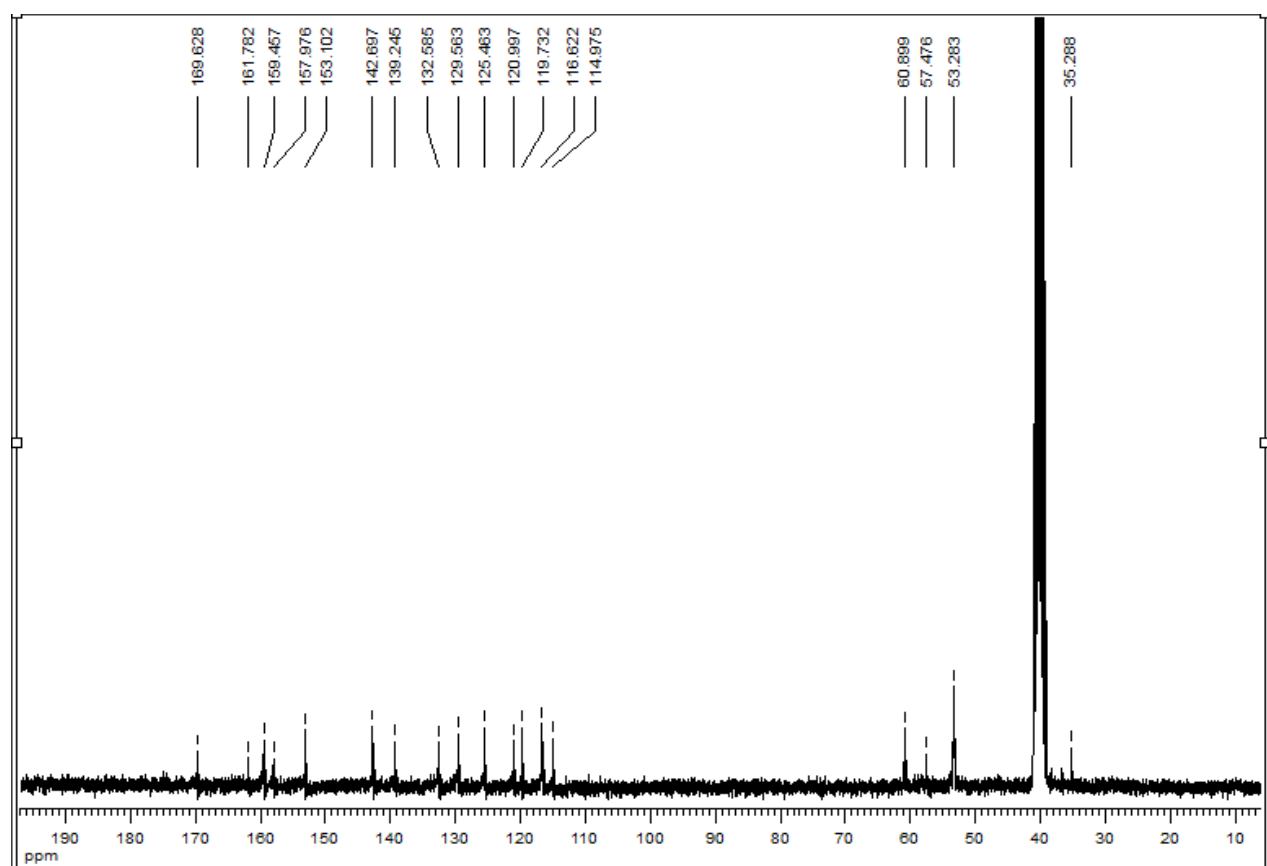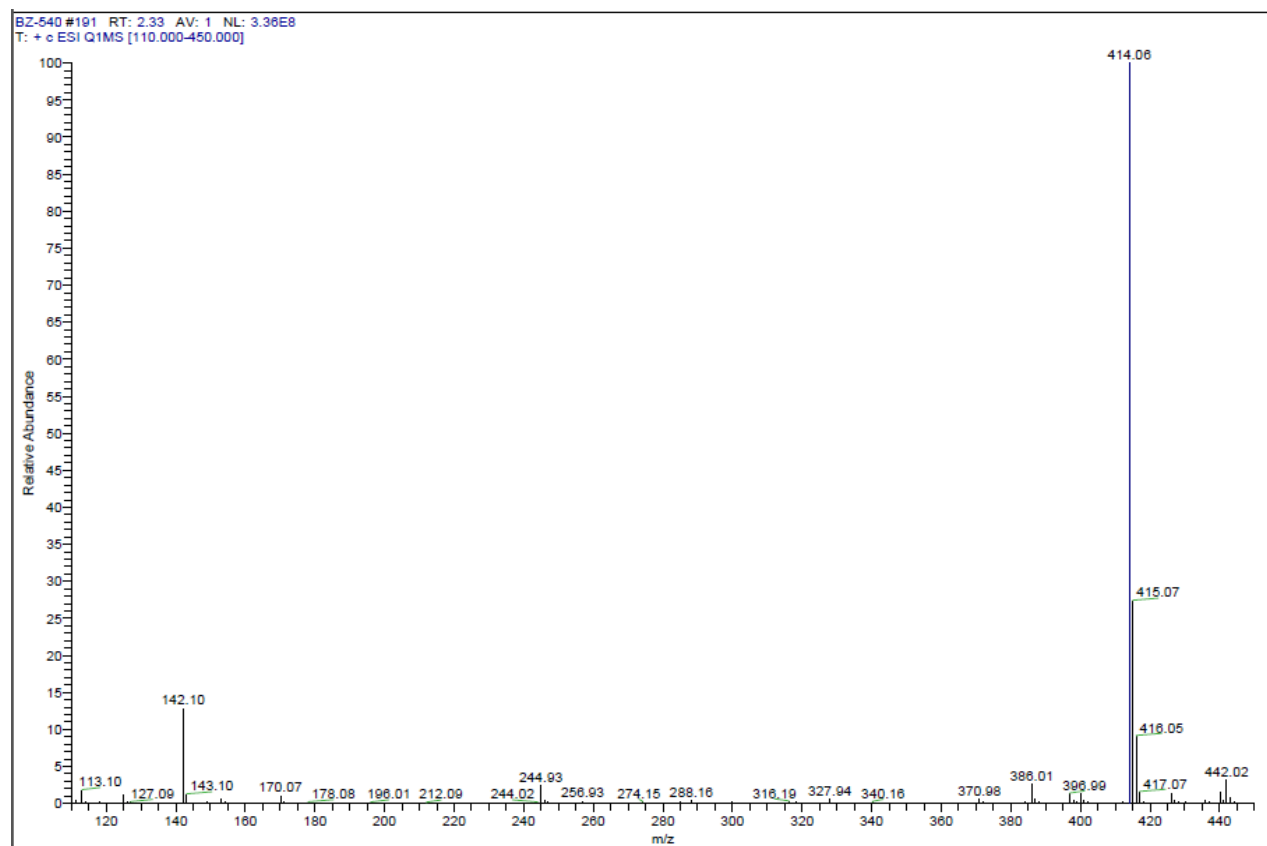

Supplement: IENZ_A_1250753_SM3037.pdf [file IENZ_A_1250753_SM3037.pdf]
